# Supplementary material for: Mendelian Randomization of Circulating Proteome Identifies Actionable Targets in Heart Failure
Source: Research Square preprint supplement (doi:10.21203/rs.3.rs-1547537/v1), 2022-04-27
Supplement: Supplementary file 1 [file 396dcdeb0c7c3f657e8d2b68.xlsx]

## Sheet: ST1
Supplementary Table 1. Mendelian randomization (IVW:inverse variance weigthted; Weighted median)
prot	nb_IVs	b_IVW	se_IVW	p_IVW	P_IVW_FDR	b_WeightedMed	se_WeightedMed	p_WeightedMed	p_Qtest	p_intercept
ABO,9253,52,3	59	0.0304043	0.00422111	5.89332e-13	4.83841e-10	0.0343731	0.00685032	5.22827e-07	0.569694	0.541436
BAG3,10078,5,3	3	-0.225711	0.0378966	2.58509e-09	1.06118e-06	-0.25394	0.0576092	1.04342e-05	0.0542163	0.0900364
FLT4,2358,19,2	12	0.0810359	0.0195305	3.33653e-05	0.00913096	0.0802899	0.0279109	0.00401928	0.567537	0.481564
TDGF1,5810,25,3	48	-0.018653	0.00473598	8.1967e-05	0.0142561	-0.0169977	0.00728117	0.0195706	0.563865	0.559696
FUT3,4548,4,2	34	-0.026201	0.00667585	8.68214e-05	0.0142561	-0.0156611	0.00924934	0.0904146	0.771182	0.979791
FSTL1,13112,179,3	8	-0.0949606	0.0245828	0.000112058	0.0153333	-0.0757786	0.0328228	0.0209592	0.52257	0.406827
ALDH3A1,11480,1,3	11	-0.0820786	0.0214981	0.000134571	0.0157833	-0.0776549	0.0294118	0.00828416	0.621038	0.614518
GLCE,7808,5,3	32	-0.0267986	0.00719434	0.000195352	0.0184506	-0.0247853	0.010288	0.0159894	0.427533	0.378125
PTHLH,2962,50,2	6	0.113315	0.0304924	0.00020226	0.0184506	0.106543	0.0407007	0.00885207	0.640817	0.510447
CDON,4541,49,2	22	-0.0410123	0.0112273	0.00025927	0.021286	-0.0560758	0.0156489	0.00033918	0.98184	0.98968
FCGR2A,3309,2,2	66	-0.016136	0.00450797	0.000344341	0.0257004	-0.0149014	0.00690091	0.0308239	0.426427	0.537932
RGMB,3331,8,1	8	-0.0833434	0.0236239	0.000418822	0.0286544	-0.0793831	0.0308808	0.0101515	0.676045	0.689237
AMH,4923,79,1	3	-0.192927	0.0551777	0.000471451	0.029774	-0.194352	0.0796918	0.0147363	0.990473	0.890435
MIF,5356,2,3	3	0.178253	0.051614	0.000553202	0.0324414	0.16015	0.0792911	0.0434069	0.707785	0.646211
IL15RA,14054,17,3	39	0.0264931	0.00794974	0.000860462	0.0447261	0.0325602	0.0118325	0.00592775	0.503678	0.457311
B3GAT3,6897,38,3	18	0.0536545	0.0161174	0.000871641	0.0447261	0.0467985	0.0231149	0.0429082	0.700205	0.769532
CCDC126,6388,21,3	14	0.059055	0.0179627	0.00101029	0.048633	0.06526	0.0225691	0.00383328	0.251625	0.218033
ST3GAL6,6947,4,3	26	-0.0222688	0.00680618	0.00106847	0.048633	-0.00811896	0.0090921	0.371874	0.191697	0.187219
APOA5,11318,20,3	7	-0.103626	0.0318153	0.00112549	0.048633	-0.12654	0.0358542	0.000416692	0.16274	0.112991

## Sheet: ST2
Supplementary Table 2. Ligand-receptor pairs generated from causal blood candidate proteins (bold are blood causal candidate proteins)
Receptors	Ligands
AVCR1B ; AVCR2A ; AVCR1C ; SMAD3 ; ACVR2B ; GPC1	TDGF1
PTH2R ; PTH1R ; ADCYAP1R1 ; GPR84 ; RAMP3 ; RAMP2 ; ADRB2 ; VIPR1 ; ADRB3 ; GPR20 ; TSHR ;	PTHLH
NEO1 ; HJV ; BMPR2 ; BMPR1B	RGMB
FLT4	PDGFC ; VEGFC ; TNF ; VEGFD ; COL1A2 ; FN1 ; COL1A1
IL15RA	IL15
CDON	IHH ; SHH ; DHH ; NTN3
CD44 ; CXCR4 ; CXCR2 ; EGFR ; CD74	MIF
ACVR1 ; EGFR ; AMHR2	AMH
FCGR2A	SYK ; CXCL9

## Sheet: ST3
Supplementary Table 3. Gene Ontology (molecular function) for ligand receptor pairs generated from blood causal candiate proteins
Term	P-value	Adjusted P-value	Odds Ratio	Genes
transmembrane receptor protein serine/threonine kinase activity (GO:0004675)	3.67657e-12	3.93393e-10	221.522	ACVR1;BMPR2;AMHR2;HJV;BMPR1B;ACVR2B
G protein-coupled receptor activity (GO:0004930)	1.08124e-10	5.78462e-09	19.894	VIPR1;ADCYAP1R1;ADRB3;CXCR2;GPR20;CXCR4;PTH2R;PTH1R;GPR84;ADRB2;TSHR
receptor ligand activity (GO:0048018)	4.59534e-09	1.639e-07	16.1386	CXCL9;SHH;IL15;VEGFC;VEGFD;MIF;AMH;TNF;TDGF1;PTHLH
G protein-coupled peptide receptor activity (GO:0008528)	6.12981e-08	1.63972e-06	34.8649	VIPR1;ADCYAP1R1;PTH2R;PTH1R;GPR84;TSHR
patched binding (GO:0005113)	5.42758e-07	1.1615e-05	311.641	SHH;DHH;IHH
activin-activated receptor activity (GO:0017002)	1.29795e-06	2.31468e-05	207.74	ACVR1;AMHR2;ACVR2B
transforming growth factor beta-activated receptor activity (GO:0005024)	3.38112e-06	5.16828e-05	138.472	ACVR1;BMPR2;BMPR1B
cytokine receptor binding (GO:0005126)	7.02467e-06	9.39549e-05	21.575	SMAD3;SYK;VEGFC;VEGFD;MIF
transmembrane receptor protein kinase activity (GO:0019199)	1.64562e-05	0.000195646	30.2325	ACVR1;FLT4;BMPR1B;EGFR
protein serine/threonine kinase activity (GO:0004674)	2.53149e-05	0.00027087	9.25843	ACVR1;BMPR2;AMHR2;SYK;BMPR1B;ACVR2B;EGFR
transforming growth factor beta receptor activity, type I (GO:0005025)	6.34385e-05	0.000522148	271.374	ACVR1;BMPR1B
C-X-C chemokine receptor activity (GO:0016494)	6.34385e-05	0.000522148	271.374	CXCR2;CXCR4
calcitonin family receptor activity (GO:0097642)	6.34385e-05	0.000522148	271.374	RAMP2;RAMP3
chemoattractant activity (GO:0042056)	7.3537e-05	0.000562032	42.931	VEGFC;VEGFD;MIF
BMP receptor activity (GO:0098821)	9.50027e-05	0.000677686	203.52	BMPR2;HJV
protease binding (GO:0002020)	0.000232276	0.00155334	14.8078	COL1A1;COL1A2;FN1;TNF
platelet-derived growth factor binding (GO:0048407)	0.000345514	0.00217471	90.4308	COL1A1;COL1A2
BMP binding (GO:0036122)	0.000413941	0.00233114	81.3837	BMPR2;HJV
vascular endothelial growth factor receptor binding (GO:0005172)	0.000413941	0.00233114	81.3837	VEGFC;VEGFD
platelet-derived growth factor receptor binding (GO:0005161)	0.000488406	0.00261297	73.9814	PDGFC;VEGFD
cytokine activity (GO:0005125)	0.00098424	0.00501494	9.96097	CXCL9;IL15;MIF;TNF
protein homodimerization activity (GO:0042803)	0.00109231	0.00519935	4.88654	ACVR1;SMAD3;ADRB3;FLT4;PDGFC;PTH1R;ADRB2
amyloid-beta binding (GO:0001540)	0.00111762	0.00519935	16.1299	CD74;RAMP3;ADRB2
growth factor activity (GO:0008083)	0.00142389	0.00629807	14.7805	VEGFC;VEGFD;TDGF1
cytokine receptor activity (GO:0004896)	0.00147151	0.00629807	14.6059	IL15RA;CD74;CD44
C-C chemokine receptor activity (GO:0016493)	0.00155858	0.00641415	38.7328	CXCR2;CXCR4
C-C chemokine binding (GO:0019957)	0.0016975	0.00672713	36.9703	CXCR2;CXCR4
chemokine receptor activity (GO:0004950)	0.00199237	0.0076137	33.8861	CXCR2;CXCR4
growth factor receptor binding (GO:0070851)	0.00243851	0.00899726	12.1612	PDGFC;VEGFC;VEGFD
protein tyrosine kinase activity (GO:0004713)	0.0026415	0.00942136	11.8119	SYK;FLT4;EGFR
chemokine binding (GO:0019956)	0.00301112	0.0102925	27.1007	CXCR2;CXCR4
phosphatase binding (GO:0019902)	0.00307813	0.0102925	11.17	SMAD3;FLT4;EGFR
transmembrane receptor protein tyrosine kinase activity (GO:0004714)	0.0102681	0.0332934	13.9979	FLT4;EGFR
CXCR3 chemokine receptor binding (GO:0048248)	0.0126863	0.0377065	99.725	CXCL9
activin receptor activity, type I (GO:0016361)	0.0126863	0.0377065	99.725	ACVR1
C-X-C chemokine binding (GO:0019958)	0.0126863	0.0377065	99.725	CXCR2
protein tyrosine kinase binding (GO:1990782)	0.0145428	0.039977	11.5913	ACVR1;BMPR2
epinephrine binding (GO:0051379)	0.0152046	0.039977	79.776	ADRB3
MHC class II protein binding (GO:0042289)	0.0152046	0.039977	79.776	CD74
myosin light chain binding (GO:0032027)	0.0152046	0.039977	79.776	CXCR4
ubiquitin binding (GO:0043130)	0.0153183	0.039977	11.2681	SMAD3;CXCR4
hormone activity (GO:0005179)	0.0169214	0.042126	10.6729	AMH;PTHLH
DEAD/H-box RNA helicase binding (GO:0017151)	0.0177165	0.042126	66.4767	SMAD3
morphogen activity (GO:0016015)	0.0177165	0.042126	66.4767	SHH
vascular endothelial growth factor-activated receptor activity (GO:0005021)	0.0177165	0.042126	66.4767	FLT4
CD4 receptor binding (GO:0042609)	0.0202222	0.0470386	56.9771	CD74
glucocorticoid receptor binding (GO:0035259)	0.0227216	0.051728	49.8525	SMAD3
co-SMAD binding (GO:0070410)	0.0252148	0.0550609	44.3111	SMAD3
activin receptor binding (GO:0070697)	0.0252148	0.0550609	44.3111	TDGF1
transition metal ion binding (GO:0046914)	0.0265669	0.0559262	3.76475	SHH;SMAD3;DHH;GPC1
hyaluronic acid binding (GO:0005540)	0.0277017	0.0559262	39.878	CD44
transferrin receptor binding (GO:1990459)	0.0277017	0.0559262	39.878	HJV
MAP kinase kinase kinase activity (GO:0004709)	0.0277017	0.0559262	39.878	EGFR
ubiquitin protein ligase binding (GO:0031625)	0.0300362	0.0587186	4.69633	SMAD3;CXCR4;EGFR
tumor necrosis factor receptor binding (GO:0005164)	0.0301825	0.0587186	36.2509	TNF
I-SMAD binding (GO:0070411)	0.032657	0.0613034	33.2283	SMAD3
intramolecular oxidoreductase activity, transposing C=C bonds (GO:0016863)	0.032657	0.0613034	33.2283	MIF
peptide hormone receptor binding (GO:0051428)	0.0351253	0.0626911	30.6708	PTHLH
phospholipase binding (GO:0043274)	0.0351253	0.0626911	30.6708	SYK
ubiquitin-like protein ligase binding (GO:0044389)	0.0351539	0.0626911	4.40636	SMAD3;CXCR4;EGFR
protein phosphatase binding (GO:0019903)	0.0393284	0.0680103	6.68848	FLT4;EGFR
protein kinase binding (GO:0019901)	0.0397635	0.0680103	3.29694	ACVR1;IL15RA;BMPR2;SMAD3
transmembrane receptor protein serine/threonine kinase binding (GO:0070696)	0.0400434	0.0680103	26.5787	TDGF1
CXCR chemokine receptor binding (GO:0045236)	0.0424933	0.0699505	24.9163	CXCL9
MHC class II protein complex binding (GO:0023026)	0.0424933	0.0699505	24.9163	CD74
transforming growth factor beta receptor binding (GO:0005160)	0.044937	0.0728524	23.4494	SMAD3
R-SMAD binding (GO:0070412)	0.0473746	0.0756579	22.1456	SMAD3
cadherin binding (GO:0045296)	0.048856	0.0768764	3.846	ACVR1;BMPR2;EGFR
transcription coactivator binding (GO:0001223)	0.0498061	0.0772355	20.9789	SMAD3
hormone receptor binding (GO:0051427)	0.0522315	0.0787151	19.929	PTHLH
fibroblast growth factor binding (GO:0017134)	0.0522315	0.0787151	19.929	GPC1
zinc ion binding (GO:0008270)	0.0541888	0.0801047	3.68168	SHH;SMAD3;DHH
bHLH transcription factor binding (GO:0043425)	0.0546508	0.0801047	18.979	SMAD3
disordered domain specific binding (GO:0097718)	0.0570641	0.0825116	18.1155	FN1
calcium ion binding (GO:0005509)	0.0589748	0.0837294	3.55145	SHH;DHH;IHH
transforming growth factor beta binding (GO:0050431)	0.0594714	0.0837294	17.327	ACVR1
MHC protein binding (GO:0042287)	0.0690403	0.0947091	14.757	CD74
tumor necrosis factor receptor superfamily binding (GO:0032813)	0.0690403	0.0947091	14.757	TNF
non-membrane spanning protein tyrosine kinase activity (GO:0004715)	0.0855567	0.115881	11.7147	SYK
phosphotyrosine residue binding (GO:0001784)	0.0902227	0.120673	11.0628	SYK
protein phosphorylated amino acid binding (GO:0045309)	0.101786	0.132822	9.71122	SYK
transcription regulatory region nucleic acid binding (GO:0001067)	0.101789	0.132822	3.83654	SMAD3;TNF
copper ion binding (GO:0005507)	0.108654	0.140072	9.04773	GPC1
chemokine activity (GO:0008009)	0.110932	0.141307	8.84622	CXCL9
kinase binding (GO:0019900)	0.112949	0.142183	2.6598	IL15RA;SMAD3;EGFR
chemokine receptor binding (GO:0042379)	0.119988	0.147571	8.12245	CXCL9
potassium channel regulator activity (GO:0015459)	0.119988	0.147571	8.12245	ADRB2
transcription coregulator binding (GO:0001221)	0.12672	0.15408	7.65269	SMAD3
myosin binding (GO:0017022)	0.133401	0.160381	7.23418	CXCR4
metal ion binding (GO:0046872)	0.144816	0.17217	2.36321	SHH;DHH;IHH
ATP binding (GO:0005524)	0.158046	0.185834	2.90935	ACVR1;BMPR1B
ATPase binding (GO:0051117)	0.170327	0.198098	5.52139	EGFR
adenyl ribonucleotide binding (GO:0032559)	0.183419	0.21103	2.63762	ACVR1;BMPR1B
nuclear receptor binding (GO:0016922)	0.264575	0.301165	3.33277	SMAD3
purine ribonucleoside triphosphate binding (GO:0035639)	0.328383	0.369863	1.73701	ACVR1;BMPR1B
actin binding (GO:0003779)	0.364872	0.40668	2.24693	CXCR4
RNA polymerase II-specific DNA-binding transcription factor binding (GO:0061629)	0.385796	0.425568	2.09101	SMAD3
transcription cis-regulatory region binding (GO:0000976)	0.410232	0.447082	1.44775	SMAD3;TNF
DNA-binding transcription factor binding (GO:0140297)	0.413655	0.447082	1.90744	SMAD3
sequence-specific double-stranded DNA binding (GO:1990837)	0.546457	0.584709	1.10601	SMAD3;TNF
DNA-binding transcription activator activity, RNA polymerase II-specific (GO:0001228)	0.575727	0.609929	1.18175	SMAD3
DNA binding (GO:0003677)	0.618227	0.648532	0.965667	SMAD3;EGFR
double-stranded DNA binding (GO:0003690)	0.815446	0.847113	0.593815	EGFR
sequence-specific DNA binding (GO:0043565)	0.840836	0.865091	0.545127	SMAD3
RNA polymerase II cis-regulatory region sequence-specific DNA binding (GO:0000978)	0.951264	0.960238	0.327544	SMAD3
cis-regulatory region sequence-specific DNA binding (GO:0000987)	0.951264	0.960238	0.327544	SMAD3
RNA polymerase II transcription regulatory region sequence-specific DNA binding (GO:0000977)	0.972495	0.972495	0.2738	SMAD3

## Sheet: ST4
Supplementary Table 4. Graph nodes (proteins) and degree
Label	Degree
MIF	39
BAG3	39
FSTL1	14
FCGR2A	14
TDGF1	12
FLT4	11
PTHLH	10
IL15RA	8
AMH	6
ALDH3A1	5
UBC	4
COPS6	2
GPC1	2
GLCE	2
ELAVL1	2
CDK2	2
GORASP2	2
STUB1	2
COPS5	2
HSP90AA1	2
POT1	2
ITGA4	2
CRYAB	2
HSP90AB1	2
IKBKG	2
AMOT	1
BAG1	1
SQSTM1	1
TINF2	1
ACD	1
SYNPO2	1
TNK2	1
HSPA8	1
WIPI2	1
IRAK1	1
HSPA4	1
TERF2	1
TERF1	1
WNK1	1
IRAK2	1
HSPB8	1
UBE2I	1
DAZAP2	1
PLCG1	1
FAM189A2	1
DVL2	1
ARL8B	1
SMAD4	1
SMAD3	1
PLK1	1
TRIM21	1
GATA2	1
CBL	1
GATA3	1
NFYB	1
SYK	1
PIK3R1	1
LGALS3	1
CRP	1
LRIF1	1
FARSA	1
NR6A1	1
BAG6	1
RIF1	1
ACVR1B	1
FBLN1	1
AP2S1	1
GDF9	1
ANG	1
ILK	1
NGFRAP1	1
IGBP1	1
TRAF6	1
FTSJ1	1
BCL2L11	1
TNFRSF14	1
ZNF408	1
CLNS1A	1
CD74	1
ATG5	1
CFLAR	1
DSTYK	1
EIF1B	1
BNIPL	1
FIBP	1
STRN4	1
VCAM1	1
IKBKE	1
TNFRSF10D	1
EPB41	1
HLA-B	1
MPG	1
PRKAB1	1
VCL	1
VHL	1
FBXO11	1
FN1	1
ONECUT1	1
ATF7IP	1
FIGF	1
KDR	1
NEDD4	1
VEGFC	1
BMP4	1
FST	1
TGFBR2	1
ACVR2B	1
INHBA	1
DIP2A	1
CD14	1
RCVRN	1
IL15	1
CDK4	1
PIAS4	1
CASK	1
LAT	1
BCL10	1
TGFB1	1
TP53	1
ITGB1	1
PSAP	1
LYN	1
SP1	1
HSPA1A	1
BCL2	1
SRF	1
BMP2	1
ETFA	1
ETS1	1
NME1	1
SHC1	1
ELF1	1
MCM7	1
BMPR1A	1
ETV5	1
HNF4A	1
CAPZB	1
SOX9	1
ARRB1	1
CAPZA1	1
ACLY	1
GRB2	1
DYNLT1	1
PTH1R	1
MCL1	1
TRAF2	1
NR5A1	1
MVP	1
KPNB1	1
SGCA	1
CYHR1	1
TTN	1
APPBP2	1
PINX1	1
ZMAT2	1

## Sheet: ST5
Supplementary Table 5. Pathway enrichment (KEGG) for the network
Term	P-value	Adjusted P-value	Odds Ratio	Genes
Pathways in cancer	1.03355e-17	2.13946e-15	9.26659	ITGB1;HSP90AB1;FLT4;PIK3R1;CBL;ETS1;BCL2L11;DVL2;PLCG1;IKBKG;VHL;IL15RA;SMAD4;HSP90AA1;SMAD3;TGFB1;IL15;FN1;VEGFC;TRAF2;TGFBR2;BMP4;BMP2;CDK4;SP1;TRAF6;CDK2;BCL2;GRB2;TP53
NF-kappa B signaling pathway	2.89356e-15	2.99484e-13	23.7833	PIAS4;LYN;UBE2I;VCAM1;SYK;TRAF2;BCL10;CFLAR;IRAK1;TRAF6;BCL2;CD14;PLCG1;IKBKG;LAT
TGF-beta signaling pathway	3.83445e-13	2.64577e-11	22.338	SMAD4;SMAD3;TGFB1;FST;INHBA;ACVR1B;ACVR2B;TGFBR2;BMP4;BMP2;SP1;AMH;BMPR1A
Lipid and atherosclerosis	9.54542e-13	4.93975e-11	12.2236	LYN;HSPA8;HSP90AA1;VCAM1;HSP90AB1;HSPA4;TRAF2;PIK3R1;IRAK1;TRAF6;BCL2;PLCG1;CD14;IKBKG;TP53;IKBKE;HSPA1A
Fluid shear stress and atherosclerosis	3.96402e-12	1.6411e-10	15.6641	PIAS4;HSP90AA1;VCAM1;HSP90AB1;PIK3R1;ACVR2B;BMP4;GPC1;KDR;BCL2;IKBKG;SQSTM1;TP53;BMPR1A
Chronic myeloid leukemia	1.5725e-11	5.42513e-10	23.2457	SMAD4;SMAD3;TGFB1;SHC1;CDK4;GRB2;IKBKG;PIK3R1;CBL;TP53;TGFBR2
Epstein-Barr virus infection	5.42213e-11	1.6034e-09	11.2632	LYN;SYK;HLA-B;TRAF2;PIK3R1;BCL2L11;IRAK1;CDK4;TRAF6;NEDD4;CDK2;BCL2;IKBKG;TP53;IKBKE
Shigellosis	8.77797e-11	2.2713e-09	9.8167	ITGB1;ILK;TRAF2;PIK3R1;BCL10;WIPI2;TRAF6;UBC;BCL2;PLCG1;CD14;IKBKG;SQSTM1;TP53;VCL;ATG5
Human T-cell leukemia virus 1 infection	1.6987e-10	3.90702e-09	10.3157	IL15RA;SMAD4;SMAD3;TGFB1;IL15;NFYB;SRF;HLA-B;PIK3R1;ETS1;TGFBR2;CDK4;CDK2;IKBKG;TP53
PI3K-Akt signaling pathway	3.12114e-10	6.24261e-09	7.62865	ITGB1;HSP90AA1;HSP90AB1;ITGA4;SYK;FLT4;FN1;VEGFC;PIK3R1;BCL2L11;CDK4;CDK2;KDR;BCL2;GRB2;IKBKG;TP53;MCL1
AGE-RAGE signaling pathway in diabetic complications	3.31733e-10	6.24261e-09	16.9566	SMAD4;SMAD3;TGFB1;VCAM1;CDK4;FN1;BCL2;VEGFC;PIK3R1;PLCG1;TGFBR2
Hepatitis B	4.20624e-10	7.25576e-09	12.1017	SMAD4;SMAD3;TGFB1;PIK3R1;TGFBR2;IRAK1;TRAF6;CDK2;BCL2;GRB2;IKBKG;TP53;IKBKE
MAPK signaling pathway	1.20313e-09	1.79347e-08	8.10186	HSPA8;TGFB1;FLT4;SRF;VEGFC;ARRB1;TRAF2;TGFBR2;IRAK1;TRAF6;KDR;GRB2;CD14;IKBKG;TP53;HSPA1A
Signaling pathways regulating pluripotency of stem cells	1.21297e-09	1.79347e-08	12.6284	BMP4;SMAD4;SMAD3;RIF1;ONECUT1;DVL2;GRB2;PIK3R1;INHBA;ACVR1B;ACVR2B;BMPR1A
Small cell lung cancer	2.4414e-09	3.36913e-08	16.6215	ITGB1;CDK4;TRAF6;CDK2;FN1;BCL2;TRAF2;IKBKG;PIK3R1;TP53
Yersinia infection	9.70549e-09	1.25565e-07	11.9549	ITGB1;FCGR2A;IRAK1;ITGA4;TRAF6;FN1;TRAF2;PIK3R1;PLCG1;IKBKG;LAT
Th17 cell differentiation	1.07744e-08	1.2997e-07	14.0405	SMAD4;HSP90AA1;SMAD3;TGFB1;HSP90AB1;GATA3;PLCG1;IKBKG;LAT;TGFBR2
Measles	1.13018e-08	1.2997e-07	11.7669	HSPA8;IRAK1;CDK4;TRAF6;CDK2;BCL2;PIK3R1;IKBKG;TP53;IKBKE;HSPA1A
Colorectal cancer	2.20778e-08	2.40532e-07	15.8257	SMAD4;BCL2L11;SMAD3;TGFB1;BCL2;GRB2;PIK3R1;TP53;TGFBR2
Gastric cancer	2.33563e-08	2.41738e-07	10.9087	SMAD4;SMAD3;TGFB1;SHC1;CDK2;DVL2;BCL2;GRB2;PIK3R1;TP53;TGFBR2
Osteoclast differentiation	5.61889e-08	5.31364e-07	11.6286	TGFB1;FCGR2A;SYK;TRAF6;GRB2;TRAF2;PIK3R1;IKBKG;SQSTM1;TGFBR2
Focal adhesion	5.64735e-08	5.31364e-07	8.72727	ITGB1;ITGA4;SHC1;FLT4;KDR;FN1;BCL2;ILK;VEGFC;GRB2;PIK3R1;VCL
Prostate cancer	6.3823e-08	5.74407e-07	13.8397	HSP90AA1;HSP90AB1;CDK2;BCL2;GRB2;PIK3R1;IKBKG;TP53;ETV5
FoxO signaling pathway	7.54737e-08	6.31834e-07	11.2419	SMAD4;BCL2L11;SMAD3;TGFB1;PLK1;CDK2;GRB2;PIK3R1;PRKAB1;TGFBR2
Cytokine-cytokine receptor interaction	7.63085e-08	6.31834e-07	6.9129	IL15RA;TGFB1;IL15;INHBA;ACVR1B;ACVR2B;TNFRSF10D;TGFBR2;BMP4;GDF9;BMP2;TNFRSF14;AMH;BMPR1A
Hepatocellular carcinoma	8.05572e-08	6.41359e-07	9.57926	SMAD4;SMAD3;TGFB1;SHC1;CDK4;DVL2;GRB2;PIK3R1;PLCG1;TP53;TGFBR2
Pancreatic cancer	1.30999e-07	1.00433e-06	15.8279	SMAD4;SMAD3;TGFB1;CDK4;IKBKG;PIK3R1;TP53;TGFBR2
Antigen processing and presentation	1.60779e-07	1.16052e-06	15.3741	CD74;HSPA8;HSP90AA1;HSP90AB1;HSPA4;NFYB;HLA-B;HSPA1A
Tuberculosis	1.62584e-07	1.16052e-06	8.89366	CD74;TGFB1;FCGR2A;IRAK1;SYK;IRAK2;NFYB;TRAF6;BCL2;BCL10;CD14
Kaposi sarcoma-associated herpesvirus infection	3.28194e-07	2.26454e-06	8.25294	LYN;SYK;CDK4;UBC;HLA-B;TRAF2;PIK3R1;PLCG1;IKBKG;TP53;IKBKE
Neurotrophin signaling pathway	3.73761e-07	2.49576e-06	11.0595	IRAK1;SHC1;IRAK2;TRAF6;BCL2;GRB2;PIK3R1;PLCG1;TP53
Cellular senescence	3.88746e-07	2.5147e-06	9.30515	SMAD3;TGFB1;CDK4;CDK2;HLA-B;PIK3R1;ETS1;SQSTM1;TP53;TGFBR2
Hepatitis C	4.12459e-07	2.58724e-06	9.24138	CDK4;TRAF6;CDK2;GRB2;TRAF2;PIK3R1;IKBKG;CFLAR;TP53;IKBKE
Viral carcinogenesis	5.43293e-07	3.3077e-06	7.81912	LYN;SYK;CDK4;SRF;CDK2;HLA-B;GRB2;TRAF2;PIK3R1;IKBKG;TP53
Hippo signaling pathway	5.83219e-07	3.44932e-06	8.87627	BMP4;SMAD4;BMP2;SMAD3;TGFB1;DVL2;AMH;AMOT;BMPR1A;TGFBR2
Endocytosis	6.50688e-07	3.74146e-06	6.8549	HSPA8;SMAD3;CAPZB;TRAF6;NEDD4;CAPZA1;HLA-B;AP2S1;ARRB1;CBL;TGFBR2;HSPA1A
Estrogen signaling pathway	1.22982e-06	6.88035e-06	9.49556	HSPA8;HSP90AA1;HSP90AB1;SHC1;SP1;BCL2;GRB2;PIK3R1;HSPA1A
Bacterial invasion of epithelial cells	2.23771e-06	1.21896e-05	13.3615	ITGB1;SHC1;FN1;ILK;PIK3R1;CBL;VCL
Toxoplasmosis	2.61112e-06	1.3859e-05	10.3302	ITGB1;HSPA8;TGFB1;IRAK1;TRAF6;BCL2;IKBKG;HSPA1A
Proteoglycans in cancer	4.6409e-06	2.40166e-05	6.9496	ITGB1;TGFB1;GPC1;KDR;FN1;GRB2;PIK3R1;PLCG1;CBL;TP53
Cell cycle	5.59016e-06	2.82235e-05	9.25592	SMAD4;SMAD3;TGFB1;MCM7;CDK4;PLK1;CDK2;TP53
Protein processing in endoplasmic reticulum	7.63686e-06	3.76388e-05	7.48973	HSPA8;HSP90AA1;HSP90AB1;BAG1;BCL2;TRAF2;STUB1;CRYAB;HSPA1A
IL-17 signaling pathway	8.53336e-06	4.10792e-05	10.7414	HSP90AA1;HSP90AB1;TRAF6;TRAF2;IKBKG;ELAVL1;IKBKE
Human papillomavirus infection	1.08401e-05	5.0998e-05	5.13651	ITGB1;ITGA4;CDK4;CDK2;HLA-B;DVL2;FN1;GRB2;PIK3R1;IKBKG;TP53;IKBKE
Autophagy	1.16594e-05	5.3633e-05	8.31767	IGBP1;TRAF6;BCL2;PIK3R1;WIPI2;CFLAR;SQSTM1;ATG5
Ubiquitin mediated proteolysis	1.36589e-05	6.05251e-05	8.1274	PIAS4;UBE2I;TRAF6;NEDD4;UBC;STUB1;VHL;CBL
Ras signaling pathway	1.37424e-05	6.05251e-05	6.09599	SHC1;FLT4;KDR;VEGFC;GRB2;PIK3R1;PLCG1;IKBKG;ETS1;LAT
Fc epsilon RI signaling pathway	1.44795e-05	6.05271e-05	12.8489	LYN;SYK;GRB2;PIK3R1;PLCG1;LAT
Chagas disease	1.46201e-05	6.05271e-05	9.83286	TGFB1;IRAK1;TRAF6;PIK3R1;IKBKG;CFLAR;TGFBR2
Longevity regulating pathway	1.46201e-05	6.05271e-05	9.83286	HSPA8;PIK3R1;PRKAB1;TP53;CRYAB;ATG5;HSPA1A
Apoptosis	1.51462e-05	6.14758e-05	8.00528	BCL2L11;BCL2;TRAF2;PIK3R1;IKBKG;CFLAR;TP53;MCL1
T cell receptor signaling pathway	1.66023e-05	6.609e-05	9.62914	CDK4;GRB2;BCL10;PIK3R1;PLCG1;IKBKG;LAT
Breast cancer	1.94716e-05	7.60495e-05	7.71536	SHC1;CDK4;SP1;FLT4;DVL2;GRB2;PIK3R1;TP53
Salmonella infection	2.52601e-05	9.58844e-05	5.65748	HSP90AA1;HSP90AB1;IRAK1;DYNLT1;TRAF6;BCL2;TRAF2;CD14;IKBKG;ARL8B
Glioma	2.54765e-05	9.58844e-05	11.5413	SHC1;CDK4;GRB2;PIK3R1;PLCG1;TP53
TNF signaling pathway	2.68884e-05	9.93909e-05	8.89189	VCAM1;IL15;VEGFC;TRAF2;PIK3R1;IKBKG;CFLAR
Leishmaniasis	2.96183e-05	0.000107561	11.215	ITGB1;TGFB1;FCGR2A;ITGA4;IRAK1;TRAF6
B cell receptor signaling pathway	3.95236e-05	0.000141058	10.6148	LYN;SYK;GRB2;IKBKG;BCL10;PIK3R1
Relaxin signaling pathway	6.64803e-05	0.000233245	7.64627	TGFB1;SHC1;VEGFC;GRB2;ARRB1;PIK3R1;TGFBR2
Hypertrophic cardiomyopathy	7.16072e-05	0.000247045	9.47315	ITGB1;TGFB1;SGCA;ITGA4;PRKAB1;TTN
Natural killer cell mediated cytotoxicity	7.32798e-05	0.000248671	7.52218	SYK;SHC1;HLA-B;GRB2;PIK3R1;PLCG1;LAT
NOD-like receptor signaling pathway	8.55457e-05	0.000285612	6.18835	HSP90AA1;HSP90AB1;TRAF6;BCL2;TRAF2;IKBKG;IKBKE;ATG5
Fc gamma R-mediated phagocytosis	0.000108707	0.000357181	8.74135	LYN;FCGR2A;SYK;PIK3R1;PLCG1;LAT
Toll-like receptor signaling pathway	0.00015967	0.000516432	8.11409	IRAK1;TRAF6;PIK3R1;CD14;IKBKG;IKBKE
Parathyroid hormone synthesis, secretion and action	0.000177244	0.000564455	7.95101	SP1;BCL2;ARRB1;GATA3;PTH1R;PTHLH
Mitophagy	0.000184345	0.000578173	10.4667	SP1;UBC;SQSTM1;TP53;ATG5
Renal cell carcinoma	0.000197516	0.000610236	10.3026	TGFB1;GRB2;PIK3R1;VHL;ETS1
RIG-I-like receptor signaling pathway	0.000211392	0.000643503	10.1436	TRAF6;TRAF2;IKBKG;IKBKE;ATG5
Non-small cell lung cancer	0.000241361	0.000724082	9.8398	CDK4;GRB2;PIK3R1;PLCG1;TP53
Human immunodeficiency virus 1 infection	0.000253545	0.000749768	5.2397	IRAK1;TRAF6;HLA-B;BCL2;TRAF2;PIK3R1;PLCG1;IKBKG
Leukocyte transendothelial migration	0.000263389	0.000767908	7.35906	ITGB1;VCAM1;ITGA4;PIK3R1;PLCG1;VCL
JAK-STAT signaling pathway	0.000274022	0.000787813	6.00828	PIAS4;IL15RA;IL15;BCL2;GRB2;PIK3R1;MCL1
Human cytomegalovirus infection	0.000378079	0.00107209	4.92254	CDK4;SP1;HLA-B;GRB2;TRAF2;PIK3R1;IKBKG;TP53
Coronavirus disease	0.000463423	0.00129633	4.76701	FCGR2A;IRAK1;SYK;TRAF6;PIK3R1;PLCG1;IKBKG;IKBKE
Herpes simplex virus 1 infection	0.000516905	0.0014033	3.34266	CD74;IRAK1;SYK;TRAF6;HLA-B;BCL2;TNFRSF14;TRAF2;PIK3R1;IKBKG;TP53;IKBKE
Intestinal immune network for IgA production	0.000517885	0.0014033	11.9211	IL15RA;TGFB1;ITGA4;IL15
ErbB signaling pathway	0.000522001	0.0014033	8.23542	SHC1;GRB2;PIK3R1;PLCG1;CBL
Chemical carcinogenesis	0.000563791	0.00149622	4.6209	HSP90AA1;HSP90AB1;BCL2;GRB2;ARRB1;PIK3R1;IKBKE;KPNB1
PD-L1 expression and PD-1 checkpoint pathway in cancer	0.000644383	0.00168845	7.84167	TRAF6;IKBKG;PIK3R1;PLCG1;LAT
MicroRNAs in cancer	0.000716369	0.00185361	4.00255	BCL2L11;UBE2I;SHC1;BCL2;GRB2;PIK3R1;PLCG1;TP53;MCL1
Chemokine signaling pathway	0.000758012	0.00193714	5.0263	LYN;SHC1;GRB2;ARRB1;PIK3R1;PLCG1;IKBKG
Dilated cardiomyopathy	0.000908681	0.00229387	7.2359	ITGB1;TGFB1;SGCA;ITGA4;TTN
Endometrial cancer	0.00106352	0.0026524	9.70861	ILK;GRB2;PIK3R1;TP53
Progesterone-mediated oocyte maturation	0.00109189	0.00269073	6.92982	HSP90AA1;HSP90AB1;PLK1;CDK2;PIK3R1
Amoebiasis	0.00119314	0.00290563	6.78625	TGFB1;FN1;PIK3R1;CD14;VCL
Rap1 signaling pathway	0.001277	0.00307371	4.57642	ITGB1;FLT4;KDR;VEGFC;PIK3R1;PLCG1;LAT
C-type lectin receptor signaling pathway	0.00130116	0.00309587	6.64848	SYK;BCL10;PIK3R1;IKBKG;IKBKE
Basal cell carcinoma	0.00144915	0.00340879	8.8836	BMP4;BMP2;DVL2;TP53
Necroptosis	0.00151579	0.00352549	5.18279	HSP90AA1;HSP90AB1;BCL2;TRAF2;CFLAR;SQSTM1
Acute myeloid leukemia	0.00182066	0.00418752	8.31788	GRB2;IKBKG;PIK3R1;CD14
Tight junction	0.00206392	0.00469485	4.86235	ITGB1;HSPA4;CDK4;NEDD4;PRKAB1;AMOT
Adherens junction	0.0022535	0.00507037	7.81971	SMAD4;SMAD3;VCL;TGFBR2
p53 signaling pathway	0.00249443	0.00555213	7.59228	CDK4;CDK2;BCL2;TP53
Platelet activation	0.00281594	0.00620106	5.52549	LYN;ITGB1;FCGR2A;SYK;PIK3R1
Pertussis	0.00288815	0.00629313	7.27483	ITGB1;IRAK1;TRAF6;CD14
Insulin signaling pathway	0.0043132	0.00930033	4.97803	SHC1;GRB2;PIK3R1;CBL;PRKAB1
Pathogenic Escherichia coli infection	0.00439875	0.00938701	4.14365	ITGB1;FCGR2A;IRAK1;TRAF6;TRAF2;IKBKG
Th1 and Th2 cell differentiation	0.00571886	0.0120796	5.94732	IKBKG;GATA3;PLCG1;LAT
Phospholipase D signaling pathway	0.00596479	0.0124718	4.59254	SYK;SHC1;GRB2;PIK3R1;PLCG1
Choline metabolism in cancer	0.00713477	0.0146569	5.56601	SP1;GRB2;PIK3R1;PLCG1
Cushing syndrome	0.00722223	0.0146569	4.37667	NR5A1;CDK4;SP1;CDK2;DVL2
Non-alcoholic fatty liver disease	0.00722223	0.0146569	4.37667	BCL2L11;TGFB1;TRAF2;PIK3R1;PRKAB1
Phenylalanine metabolism	0.0075193	0.0151116	17.281	ALDH3A1;MIF
Legionellosis	0.00983929	0.019584	7.23355	HSPA8;CD14;HSPA1A
HIF-1 signaling pathway	0.0102954	0.0202967	4.98013	BCL2;PIK3R1;PLCG1;VHL
VEGF signaling pathway	0.01081	0.02111	6.97451	KDR;PIK3R1;PLCG1
Growth hormone synthesis, secretion and action	0.0138527	0.026551	4.54477	SHC1;GRB2;PIK3R1;PLCG1
Sphingolipid signaling pathway	0.0138527	0.026551	4.54477	BCL2;TRAF2;PIK3R1;TP53
Inflammatory bowel disease	0.0140449	0.0266725	6.29764	SMAD3;TGFB1;GATA3
AMPK signaling pathway	0.0142461	0.0268086	4.50537	HNF4A;PIK3R1;PRKAB1;ELAVL1
Thyroid hormone signaling pathway	0.0146466	0.0273139	4.46663	BMP4;PIK3R1;PLCG1;TP53
Adipocytokine signaling pathway	0.0164746	0.0304486	5.91477	TRAF2;IKBKG;PRKAB1
Transcriptional misregulation in cancer	0.0170204	0.0306395	3.5041	SP1;CD14;TP53;ETV5;TGFBR2
Epithelial cell signaling in Helicobacter pylori infection	0.0171165	0.0306395	5.8262	LYN;IKBKG;PLCG1
Prolactin signaling pathway	0.0171165	0.0306395	5.8262	SHC1;GRB2;PIK3R1
Maturity onset diabetes of the young	0.0171699	0.0306395	10.7958	HNF4A;ONECUT1
Melanoma	0.0184418	0.0326278	5.65675	CDK4;PIK3R1;TP53
Diabetic cardiomyopathy	0.0210949	0.0370055	3.30758	SMAD3;TGFB1;SP1;PIK3R1;TGFBR2
Arrhythmogenic right ventricular cardiomyopathy	0.0219981	0.0382656	5.2732	ITGB1;SGCA;ITGA4
Spinocerebellar ataxia	0.0253029	0.0436475	3.75549	SP1;TRAF2;PIK3R1;WIPI2
Regulation of actin cytoskeleton	0.0276067	0.047228	3.0723	ITGB1;ITGA4;FN1;PIK3R1;VCL
Cell adhesion molecules	0.0282349	0.0479067	3.62417	ITGB1;VCAM1;ITGA4;HLA-B
Phagosome	0.0307204	0.0517002	3.52551	ITGB1;FCGR2A;HLA-B;CD14
ECM-receptor interaction	0.0310453	0.0518257	4.58824	ITGB1;ITGA4;FN1
Tyrosine metabolism	0.0316525	0.0524166	7.61669	ALDH3A1;MIF
Bladder cancer	0.0401814	0.0653512	6.63851	CDK4;TP53
Ferroptosis	0.0401814	0.0653512	6.63851	TP53;ATG5
Wnt signaling pathway	0.0404104	0.0653512	3.21854	SMAD4;SMAD3;DVL2;TP53
Influenza A	0.0450377	0.0722698	3.10265	CDK4;PIK3R1;IKBKG;IKBKE
Axon guidance	0.0533821	0.0850007	2.92685	ITGB1;ILK;PIK3R1;PLCG1
RNA transport	0.0569398	0.0899736	2.86195	UBE2I;CLNS1A;EIF1B;KPNB1
Malaria	0.0573977	0.09001	5.39134	TGFB1;VCAM1
Neutrophil extracellular trap formation	0.05969	0.0929009	2.81511	FCGR2A;SYK;PIK3R1;PLCG1
Endocrine and other factor-regulated calcium reabsorption	0.0636134	0.0982684	5.07343	AP2S1;PTH1R
Amyotrophic lateral sclerosis	0.0644341	0.098799	2.19193	BCL2;TRAF2;ANG;WIPI2;SQSTM1;TP53
Hedgehog signaling pathway	0.0700445	0.106612	4.79085	BCL2;ARRB1
Pathways of neurodegeneration	0.076954	0.116274	1.95829	UBC;DVL2;BCL2;TRAF2;PLCG1;WIPI2;SQSTM1
Viral myocarditis	0.0789317	0.118398	4.45954	SGCA;HLA-B
Cytosolic DNA-sensing pathway	0.0858153	0.127797	4.23958	IKBKG;IKBKE
GnRH secretion	0.0881489	0.130334	4.17099	ARRB1;PIK3R1
Huntington disease	0.0899962	0.131227	2.16434	SP1;AP2S1;TRAF2;WIPI2;TP53
Cortisol synthesis and secretion	0.0905014	0.131227	4.10458	NR5A1;SP1
Apelin signaling pathway	0.0906547	0.131227	2.90323	SMAD4;SMAD3;PRKAB1
Central carbon metabolism in cancer	0.102532	0.14739	3.80181	PIK3R1;TP53
Spliceosome	0.111119	0.158632	2.64474	HSPA8;ZMAT2;HSPA1A
PPAR signaling pathway	0.112453	0.159437	3.58987	UBC;ILK
Calcium signaling pathway	0.116635	0.164242	2.20103	FLT4;KDR;VEGFC;PLCG1
mTOR signaling pathway	0.117744	0.164683	2.57415	DVL2;GRB2;PIK3R1
Histidine metabolism	0.157392	0.218659	6.12987	ALDH3A1
Rheumatoid arthritis	0.162428	0.224151	2.83761	TGFB1;IL15
Phosphatidylinositol signaling system	0.17341	0.237722	2.71758	PIK3R1;PLCG1
Inflammatory mediator regulation of TRP channels	0.176175	0.239922	2.68913	PIK3R1;PLCG1
Hematopoietic cell lineage	0.178946	0.242104	2.66128	ITGA4;CD14
Viral protein interaction with cytokine and cytokine receptor	0.181725	0.244266	2.63399	TNFRSF14;TNFRSF10D
Phototransduction	0.195869	0.261579	4.76623	RCVRN
Drug metabolism	0.204163	0.269183	2.43421	ALDH3A1;NME1
Insulin resistance	0.204163	0.269183	2.43421	PIK3R1;PRKAB1
Citrate cycle (TCA cycle)	0.208302	0.271185	4.43708	ACLY
beta-Alanine metabolism	0.208302	0.271185	4.43708	ALDH3A1
Circadian rhythm	0.214447	0.27744	4.28896	PRKAB1
Cholinergic synapse	0.21834	0.280723	2.32397	BCL2;PIK3R1
Base excision repair	0.226595	0.289538	4.0205	MPG
cAMP signaling pathway	0.235112	0.298578	1.81913	SOX9;PIK3R1;AMH
DNA replication	0.244467	0.308566	3.67532	MCM7
African trypanosomiasis	0.250333	0.310294	3.57305	VCAM1
Aldosterone-regulated sodium reabsorption	0.250333	0.310294	3.57305	PIK3R1
Thyroid cancer	0.250333	0.310294	3.57305	TP53
Allograft rejection	0.256154	0.313751	3.47631	HLA-B
Primary immunodeficiency	0.256154	0.313751	3.47631	IKBKG
Oocyte meiosis	0.264135	0.321624	2.02954	PLK1;CDK2
Graft-versus-host disease	0.278991	0.337726	3.13652	HLA-B
Systemic lupus erythematosus	0.28136	0.338614	1.93739	FCGR2A;TRIM21
Type I diabetes mellitus	0.284591	0.340522	3.06169	HLA-B
Type II diabetes mellitus	0.301132	0.358243	2.85714	PIK3R1
Parkinson disease	0.304104	0.359712	1.57245	UBC;PLCG1;TP53
Carbohydrate digestion and absorption	0.30656	0.360557	2.79489	PIK3R1
Sphingolipid metabolism	0.317292	0.371071	2.67817	PSAP
Alzheimer disease	0.32094	0.373058	1.41377	DVL2;TRAF2;PIK3R1;WIPI2
Vibrio cholerae infection	0.322596	0.373058	2.62338	PLCG1
Autoimmune thyroid disease	0.338264	0.386854	2.47165	HLA-B
Glycosaminoglycan biosynthesis	0.338264	0.386854	2.47165	GLCE
Regulation of lipolysis in adipocytes	0.348508	0.39638	2.37987	PIK3R1
Pyrimidine metabolism	0.353571	0.399304	2.33648	NME1
Prion disease	0.354937	0.399304	1.43092	HSPA8;PIK3R1;HSPA1A
Notch signaling pathway	0.368527	0.412352	2.21529	DVL2
Long-term depression	0.373435	0.415597	2.17764	LYN
Aminoacyl-tRNA biosynthesis	0.402099	0.445105	1.97602	FARSA
Glycolysis / Gluconeogenesis	0.406749	0.447856	1.94599	ALDH3A1
Alcoholism	0.423686	0.464037	1.39677	SHC1;GRB2
Inositol phosphate metabolism	0.433898	0.472721	1.78328	PLCG1
Metabolism of xenobiotics by cytochrome P450	0.447006	0.484452	1.71169	ALDH3A1
Synaptic vesicle cycle	0.455577	0.491169	1.66706	AP2S1
Gap junction	0.496491	0.532506	1.4747	GRB2
Morphine addiction	0.508159	0.542211	1.42532	ARRB1
GnRH signaling pathway	0.515788	0.547528	1.3942	GRB2
Staphylococcus aureus infection	0.523299	0.552668	1.3644	FCGR2A
Thermogenesis	0.53887	0.566224	1.11481	GRB2;PRKAB1
Melanogenesis	0.545145	0.569924	1.28214	DVL2
Glucagon signaling pathway	0.565996	0.588749	1.2092	PRKAB1
Lysosome	0.631771	0.653587	1.00818	PSAP
Purine metabolism	0.634643	0.653587	1.00025	NME1
Dopaminergic synapse	0.643126	0.659045	0.977198	ARRB1
Adrenergic signaling in cardiomyocytes	0.690071	0.703668	0.858363	BCL2
Oxytocin signaling pathway	0.699639	0.709928	0.835752	PRKAB1
cGMP-PKG signaling pathway	0.728755	0.735864	0.769793	SRF
Neuroactive ligand-receptor interaction	0.931157	0.935677	0.372517	PTH1R
Olfactory transduction	0.968617	0.968617	0.287046	ARRB1

## Sheet: ST6
Supplementary Table 6. Crossphenotype association analysis of HF using iCPAG
Trait1	Trait2	P_fisher	Padj_FDR	Padj_Bonferroni	ChaoSorensen	SNPshare_all	Trait2_EFO	Trait2_ParentTerm	Trait2_ParentEFO
User_trait	heart failure	6.09736e-56	1.62982e-52	1.62982e-52	0.99	rs11745324|rs4766578|rs660240|rs1556516|rs600038|rs4746140|rs17617337|rs17042102|rs55730499|rs4135240|rs56094641	http://www,ebi,ac,uk/efo/EFO_0003144	Cardiovascular disease	http://www,ebi,ac,uk/efo/EFO_0000319
User_trait	Beta blocking agent use measurement	1.36006e-23	1.81773e-20	3.63545e-20	0.387712	rs74617384-rs55730499|rs3218020-rs2891168-rs1556516|rs4970834-rs660240|rs11646715-rs56094641|rs4307025-rs17042102-rs17042098|rs11066301-rs4766578-rs7310615	http://www,ebi,ac,uk/efo/EFO_0009929	Other measurement	http://www,ebi,ac,uk/efo/EFO_0001444
User_trait	coronary artery disease	2.70959e-23	2.41425e-20	7.24274e-20	0.115264	rs600038-rs507666|rs186696265-rs9295128|rs4135240-rs1321309|rs3218020-rs4977574-rs1556516|rs55730499|rs660240-rs602633|rs3184504-rs4766578	NA	NA	NA
User_trait	low density lipoprotein cholesterol measurement	9.09314e-21	4.05099e-18	2.4306e-17	0.0505375	rs2519093-rs600038|rs186696265-rs9295128|rs3218020-rs6475606-rs1556516|rs660240-rs6657811-rs4970834-rs611917-rs67269326|rs4766578-rs597808|rs56094641-rs62033400|rs118039278-rs55730499	http://www,ebi,ac,uk/efo/EFO_0004611	Lipid or lipoprotein measurement	http://www,ebi,ac,uk/efo/EFO_0004732
User_trait	myocardial infarction	4.87246e-20	1.86059e-17	1.30241e-16	0.379972	rs3218020-rs2891168-rs1556516|rs660240-rs7528419|rs4766578-rs653178|rs55730499-rs10455872|rs532436-rs600038	http://www,ebi,ac,uk/efo/EFO_0000612	Cardiovascular disease	http://www,ebi,ac,uk/efo/EFO_0000319
User_trait	apolipoprotein B measurement	1.24941e-19	3.8237e-17	3.33969e-16	0.0876437	rs117733303-rs9295128|rs115478735-rs600038|rs3218020-rs6475606-rs1556516|rs4766578-rs597808|rs118039278-rs55730499|rs660240-rs67269326-rs6657811	http://www,ebi,ac,uk/efo/EFO_0004615	Lipid or lipoprotein measurement	http://www,ebi,ac,uk/efo/EFO_0004732
User_trait	parental longevity	1.28744e-19	3.8237e-17	3.44133e-16	0.315448	rs186696265-rs9295128-rs9456508|rs4766578-rs7137828|rs660240-rs599839|rs55730499-rs10455872|rs1556516	http://www,ebi,ac,uk/efo/EFO_0007796	Other measurement	http://www,ebi,ac,uk/efo/EFO_0001444
User_trait	aspirin use measurement	1.28388e-18	3.4318e-16	3.4318e-15	0.7	rs74617384-rs55730499|rs3218020-rs1831733-rs1556516|rs583104-rs660240|rs635634-rs600038	http://www,ebi,ac,uk/efo/EFO_0007013	Other measurement	http://www,ebi,ac,uk/efo/EFO_0001444
User_trait	total cholesterol measurement	2.0916e-18	5.08258e-16	5.59084e-15	0.054988	rs186696265-rs9295128|rs660240-rs7528419|rs4766578-rs653178|rs55730499-rs10455872|rs532436-rs600038|rs3218020-rs1556516-rs10738607	http://www,ebi,ac,uk/efo/EFO_0004574	Lipid or lipoprotein measurement	http://www,ebi,ac,uk/efo/EFO_0004732
User_trait	HMG CoA reductase inhibitor use measurement	2.89056e-18	6.43873e-16	7.72648e-15	0.172358	rs74617384-rs55730499|rs12740374-rs660240|rs2519093-rs600038|rs56094641-rs1421085|rs1537371-rs1556516	http://www,ebi,ac,uk/efo/EFO_0009932	Other measurement	http://www,ebi,ac,uk/efo/EFO_0001444
User_trait	Antithrombotic agent use measurement	4.37122e-18	8.9879e-16	1.16843e-14	0.651109	rs74617384-rs55730499|rs3218020-rs1831733-rs1556516|rs12740374-rs660240|rs532436-rs600038	http://www,ebi,ac,uk/efo/EFO_0009925	Other measurement	http://www,ebi,ac,uk/efo/EFO_0001444
User_trait	peripheral arterial disease	3.65881e-17	6.98572e-15	9.78001e-14	0.453898	rs3218020-rs1537372-rs1556516|rs11066301-rs4766578|rs660240-rs7528419|rs118039278-rs55730499	http://www,ebi,ac,uk/efo/EFO_0004265	Cardiovascular disease	http://www,ebi,ac,uk/efo/EFO_0000319
User_trait	Ischemic stroke	6.49588e-17	1.15757e-14	1.73635e-13	0.406771	rs13143308-rs4307025-rs17042102|rs635634-rs600038|rs3184504-rs4766578|rs3218020-rs7859727-rs1556516	http://purl,obolibrary,org/obo/HP_0002140	Other trait	http://www,ebi,ac,uk/efo/EFO_0000001
User_trait	Agents acting on the renin-angiotensin system use measurement	7.45907e-17	1.24613e-14	1.99381e-13	0.0908628	rs55872725-rs56094641|rs10217586-rs1556516|rs4970834-rs660240|rs4766578-rs7310615-rs11066309|rs55730499	http://www,ebi,ac,uk/efo/EFO_0009931	Other measurement	http://www,ebi,ac,uk/efo/EFO_0001444
User_trait	coronary heart disease	9.10724e-16	1.43198e-13	2.43436e-12	0.234388	rs3218020-rs7865618|rs660240-rs646776|rs579459-rs600038|rs1556516-rs1333049	http://www,ebi,ac,uk/efo/EFO_0001645	Cardiovascular disease	http://www,ebi,ac,uk/efo/EFO_0000319
User_trait	systolic blood pressure	4.20685e-13	5.91838e-11	1.12449e-09	0.0162792	rs11642015-rs56094641|rs7095308-rs17617337|rs4746140-rs7394190|rs4766578-rs7137828|rs1333045-rs1556516	http://www,ebi,ac,uk/efo/EFO_0006335	Other measurement	http://www,ebi,ac,uk/efo/EFO_0001444
User_trait	stroke	1.99885e-12	2.67146e-10	5.34293e-09	0.208966	rs6843082-rs4307025-rs17042102|rs3184504-rs4766578|rs3218020-rs7859727-rs1556516	http://www,ebi,ac,uk/efo/EFO_0000712	Cardiovascular disease	http://www,ebi,ac,uk/efo/EFO_0000319
User_trait	apolipoprotein A 1 measurement	1.10334e-11	1.34055e-09	2.94922e-08	0.0248996	rs55730499-rs10455872|rs12740374-rs660240|rs3184504-rs4766578|rs635634-rs600038	http://www,ebi,ac,uk/efo/EFO_0004614	Lipid or lipoprotein measurement	http://www,ebi,ac,uk/efo/EFO_0004732
User_trait	diastolic blood pressure	2.21576e-11	2.5751e-09	5.92273e-08	0.0209528	rs600038-rs507666|rs9644861-rs1556516|rs3184504-rs4766578|rs17617337	http://www,ebi,ac,uk/efo/EFO_0006336	Other measurement	http://www,ebi,ac,uk/efo/EFO_0001444
User_trait	pulse pressure measurement	3.14978e-11	3.33363e-09	8.41937e-08	0.0192035	rs56094641-rs1421085|rs11000752-rs4746140|rs4135240-rs3176336|rs1333045-rs1556516	http://www,ebi,ac,uk/efo/EFO_0005763	Cardiovascular measurement	http://www,ebi,ac,uk/efo/EFO_0004298
User_trait	type II diabetes mellitus	3.3673e-11	3.33363e-09	9.00079e-08	0.0188881	rs3218020-rs1063192|rs56094641-rs1421085|rs3184504-rs4766578|rs635634-rs600038	http://www,ebi,ac,uk/efo/EFO_0001360	Metabolic disorder	http://www,ebi,ac,uk/efo/EFO_0000589
User_trait	HbA1c measurement	5.18973e-11	4.95434e-09	1.38721e-07	0.086654	rs1558902-rs56094641|rs579459-rs600038|rs4766578-rs10774625	http://www,ebi,ac,uk/efo/EFO_0004541	Hematological measurement	http://www,ebi,ac,uk/efo/EFO_0004503
User_trait	triglyceride measurement	7.79243e-11	7.18247e-09	2.08292e-07	0.0153365	rs2395655-rs4135240|rs2519093-rs600038|rs56094641-rs28567725|rs186696265-rs9295128	http://www,ebi,ac,uk/efo/EFO_0004530	Lipid or lipoprotein measurement	http://www,ebi,ac,uk/efo/EFO_0004529
User_trait	leukocyte count	1.19446e-10	9.97744e-09	3.19278e-07	0.0137915	rs2519093-rs600038|rs4135240-rs3176336|rs3184504-rs4766578|rs9972653-rs56094641	http://www,ebi,ac,uk/efo/EFO_0004308	Hematological measurement	http://www,ebi,ac,uk/efo/EFO_0004503
User_trait	high density lipoprotein cholesterol measurement	1.38326e-10	1.12044e-08	3.69746e-07	0.0132972	rs532436-rs600038|rs12740374-rs660240|rs3184504-rs4766578|rs3751812-rs56094641	http://www,ebi,ac,uk/efo/EFO_0004612	Lipid or lipoprotein measurement	http://www,ebi,ac,uk/efo/EFO_0004732
User_trait	Vasodilators used in cardiac diseases use measurement	2.69369e-10	2.11772e-08	7.20024e-07	0.208333	rs1333047-rs1556516|rs55730499	http://www,ebi,ac,uk/efo/EFO_0009926	Other measurement	http://www,ebi,ac,uk/efo/EFO_0001444
User_trait	colorectal cancer	2.87852e-10	2.19837e-08	7.69429e-07	0.05147	rs1556516-rs1412834|rs3176326-rs1321310-rs4135240|rs4766578-rs597808	http://www,ebi,ac,uk/efo/EFO_0005842	Cancer	http://www,ebi,ac,uk/efo/EFO_0000616
User_trait	atrial fibrillation	1.00868e-09	7.48945e-08	2.6962e-06	0.0346676	rs4746140-rs60212594|rs6843082-rs4307025-rs17042102|rs3176326	http://www,ebi,ac,uk/efo/EFO_0000275	Cardiovascular disease	http://www,ebi,ac,uk/efo/EFO_0000319
User_trait	cardiovascular disease	2.93045e-09	2.06134e-07	7.8331e-06	0.0246194	rs12740374-rs660240|rs7187250-rs56094641|rs3184504-rs4766578	http://www,ebi,ac,uk/efo/EFO_0000319	Other disease	http://www,ebi,ac,uk/efo/EFO_0000408
User_trait	Abdominal Aortic Aneurysm	4.04038e-09	2.76921e-07	1.07999e-05	0.172677	rs660240-rs602633|rs10757274-rs3218020-rs1556516	http://www,ebi,ac,uk/efo/EFO_0004214	Cardiovascular disease	http://www,ebi,ac,uk/efo/EFO_0000319
User_trait	lipoprotein-associated phospholipase A(2) measurement	8.17035e-09	5.45984e-07	2.18394e-05	0.147906	rs55730499-rs10455872|rs12740374-rs660240	http://www,ebi,ac,uk/efo/EFO_0004746	Lipid or lipoprotein measurement	http://www,ebi,ac,uk/efo/EFO_0004732
User_trait	body height	1.98074e-08	1.23128e-06	5.29452e-05	0.00384894	rs2395655-rs4135240|rs12740374-rs660240|rs3184504-rs4766578|rs2234962-rs17617337	http://www,ebi,ac,uk/efo/EFO_0004339	Body measurement	http://www,ebi,ac,uk/efo/EFO_0004324
User_trait	C-reactive protein measurement	2.3652e-08	1.40493e-06	6.32217e-05	0.0124634	rs660240-rs7528419|rs56094641|rs635634-rs643434-rs600038	http://www,ebi,ac,uk/efo/EFO_0004458	Inflammatory measurement	http://www,ebi,ac,uk/efo/EFO_0004872
User_trait	glaucoma	1.14451e-07	6.37346e-06	0.000305926	0.061725	rs3218020-rs944801|rs3184504-rs4766578	http://www,ebi,ac,uk/efo/EFO_0000516	Other disease	http://www,ebi,ac,uk/efo/EFO_0000408
User_trait	tonsillectomy risk measurement	1.4326e-07	7.65869e-06	0.000382935	0.0563537	rs3184504-rs4766578|rs635634-rs600038	http://www,ebi,ac,uk/efo/EFO_0007924	Other measurement	http://www,ebi,ac,uk/efo/EFO_0001444
User_trait	open-angle glaucoma	1.4326e-07	7.65869e-06	0.000382935	0.0563537	rs3218020-rs944801|rs4766578-rs7137828	http://www,ebi,ac,uk/efo/EFO_0004190	Other disease	http://www,ebi,ac,uk/efo/EFO_0000408
User_trait	allergic rhinitis	1.69735e-07	8.89612e-06	0.000453702	0.0525416	rs2519093-rs600038|rs4766578-rs35350651	http://www,ebi,ac,uk/efo/EFO_0005854	Immune system disorder	http://www,ebi,ac,uk/efo/EFO_0000540
User_trait	lipoprotein A measurement	1.80953e-07	9.30168e-06	0.000483688	0.0511571	rs186696265-rs9295128|rs118039278-rs55730499	http://www,ebi,ac,uk/efo/EFO_0006925	Lipid or lipoprotein measurement	http://www,ebi,ac,uk/efo/EFO_0004732
User_trait	hypertension	4.53185e-07	2.0593e-05	0.00121136	0.0343827	rs1333047-rs1556516|rs4766578-rs10774625	http://www,ebi,ac,uk/efo/EFO_0000537	Cardiovascular disease	http://www,ebi,ac,uk/efo/EFO_0000319
User_trait	Diuretic use measurement	4.62246e-07	2.0593e-05	0.00123558	0.0340805	rs4766578-rs7310615-rs11066309|rs56094641	http://www,ebi,ac,uk/efo/EFO_0009928	Other measurement	http://www,ebi,ac,uk/efo/EFO_0001444
User_trait	mean arterial pressure	4.62246e-07	2.0593e-05	0.00123558	0.0340805	rs11642015-rs56094641|rs4766578-rs653178	http://www,ebi,ac,uk/efo/EFO_0006340	Other measurement	http://www,ebi,ac,uk/efo/EFO_0001444
User_trait	Calcium channel blocker use measurement	4.80637e-07	2.10613e-05	0.00128474	0.0334918	rs62033406-rs56094641|rs3184504-rs4766578	http://www,ebi,ac,uk/efo/EFO_0009930	Other measurement	http://www,ebi,ac,uk/efo/EFO_0001444
User_trait	blood urea nitrogen measurement	6.29996e-07	2.7161e-05	0.00168398	0.0296502	rs8050136-rs56094641|rs635634-rs600038	http://www,ebi,ac,uk/efo/EFO_0004741	Other measurement	http://www,ebi,ac,uk/efo/EFO_0001444
User_trait	serum metabolite measurement	7.06598e-07	2.99799e-05	0.00188874	0.0281436	rs651007-rs600038|rs660240-rs646776	http://www,ebi,ac,uk/efo/EFO_0005653	Other measurement	http://www,ebi,ac,uk/efo/EFO_0001444
User_trait	blood protein measurement	7.19919e-07	3.00679e-05	0.00192434	0.00402566	rs149092047-rs600038|rs12740374-rs660240|rs3184504-rs4766578	http://www,ebi,ac,uk/efo/EFO_0007937	Other measurement	http://www,ebi,ac,uk/efo/EFO_0001444
User_trait	allergy	9.36645e-07	3.79341e-05	0.00250365	0.0247322	rs2519093-rs600038|rs4766578-rs7137828	http://www,ebi,ac,uk/efo/EFO_0003785	Immune system disorder	http://www,ebi,ac,uk/efo/EFO_0000540
User_trait	vitamin D measurement	9.36645e-07	3.79341e-05	0.00250365	0.0247322	rs532436-rs600038|rs660240-rs7528419	http://www,ebi,ac,uk/efo/EFO_0004631	Other measurement	http://www,ebi,ac,uk/efo/EFO_0001444
User_trait	granulocyte count	1.07071e-06	4.08333e-05	0.00286201	0.0232488	rs3184504-rs4766578|rs635634-rs600038	http://www,ebi,ac,uk/efo/EFO_0007987	Hematological measurement	http://www,ebi,ac,uk/efo/EFO_0004503
User_trait	blood metabolite measurement	1.08461e-06	4.08333e-05	0.00289916	0.0231102	rs649129-rs600038|rs3184504-rs4766578	http://www,ebi,ac,uk/efo/EFO_0005664	Other measurement	http://www,ebi,ac,uk/efo/EFO_0001444
User_trait	hematocrit	1.11268e-06	4.13081e-05	0.00297419	0.0228379	rs8176643-rs600038|rs3184504-rs4766578	http://www,ebi,ac,uk/efo/EFO_0004348	Hematological measurement	http://www,ebi,ac,uk/efo/EFO_0004503
User_trait	heel bone mineral density	1.17537e-06	4.30378e-05	0.00314176	0.00341929	rs56094641-rs8063057|rs660240|rs635634-rs600038	http://www,ebi,ac,uk/efo/EFO_0009270	Other measurement	http://www,ebi,ac,uk/efo/EFO_0001444
User_trait	myeloid white cell count	1.19903e-06	4.33108e-05	0.003205	0.0220581	rs3184504-rs4766578|rs635634-rs600038	http://www,ebi,ac,uk/efo/EFO_0007988	Hematological measurement	http://www,ebi,ac,uk/efo/EFO_0004503
User_trait	neutrophil count	1.30384e-06	4.64689e-05	0.00348517	0.0212131	rs3184504-rs4766578|rs635634-rs600038	http://www,ebi,ac,uk/efo/EFO_0004833	Hematological measurement	http://www,ebi,ac,uk/efo/EFO_0004503
User_trait	Eczema	1.59351e-06	5.60455e-05	0.00425946	0.0193107	rs4766578-rs653178|rs495828-rs600038	http://purl,obolibrary,org/obo/HP_0000964	Other trait	http://www,ebi,ac,uk/efo/EFO_0000001
User_trait	PR interval	2.57169e-06	8.92743e-05	0.00687412	0.0153979	rs3176326-rs730506-rs4135240|rs4746140-rs7394152	http://www,ebi,ac,uk/efo/EFO_0004462	Cardiovascular measurement	http://www,ebi,ac,uk/efo/EFO_0004298
User_trait	urate measurement	2.85823e-06	9.79495e-05	0.00764006	0.0146417	rs8050136-rs56094641|rs4766578-rs10774625	http://www,ebi,ac,uk/efo/EFO_0004531	Other measurement	http://www,ebi,ac,uk/efo/EFO_0001444
User_trait	white matter microstructure measurement	2.92651e-06	9.90197e-05	0.00782255	0.0144776	rs10120688-rs3218020|rs4766578-rs7310615	http://www,ebi,ac,uk/efo/EFO_0005674	Other measurement	http://www,ebi,ac,uk/efo/EFO_0001444
User_trait	breast carcinoma	5.07385e-06	0.00016953	0.0135624	0.0111144	rs3218020-rs10811650-rs1556516|rs62048402-rs56094641	http://www,ebi,ac,uk/efo/EFO_0000305	Cancer	http://www,ebi,ac,uk/efo/EFO_0000616
User_trait	hemoglobin measurement	6.24967e-06	0.000206239	0.0167054	0.0100481	rs495828-rs600038|rs3184504-rs4766578	http://www,ebi,ac,uk/efo/EFO_0004509	Hematological measurement	http://www,ebi,ac,uk/efo/EFO_0004503
User_trait	age at menarche	6.38411e-06	0.000208106	0.0170647	0.00994494	rs11642015-rs56094641|rs11745324-rs56289631	http://www,ebi,ac,uk/efo/EFO_0004703	Other measurement	http://www,ebi,ac,uk/efo/EFO_0001444
User_trait	appendicitis	9.78653e-06	0.000264236	0.0261594	0.0625	rs2129979-rs4307025-rs17042102	http://www,ebi,ac,uk/efo/EFO_0007149	Immune system disorder	http://www,ebi,ac,uk/efo/EFO_0000540
User_trait	protein jagged-1 measurement	9.78653e-06	0.000264236	0.0261594	0.0625	rs651007-rs600038	http://www,ebi,ac,uk/efo/EFO_0008271	Other measurement	http://www,ebi,ac,uk/efo/EFO_0001444
User_trait	OX-2 membrane glycoprotein measurement	9.78653e-06	0.000264236	0.0261594	0.0625	rs651007-rs600038	http://www,ebi,ac,uk/efo/EFO_0008253	Other measurement	http://www,ebi,ac,uk/efo/EFO_0001444
User_trait	sugar sweetened beverage consumption measurement	9.78653e-06	0.000264236	0.0261594	0.0625	rs55872725-rs56094641	http://www,ebi,ac,uk/efo/EFO_0010097	Other measurement	http://www,ebi,ac,uk/efo/EFO_0001444
User_trait	non-grapefruit juice consumption measurement	9.78653e-06	0.000264236	0.0261594	0.0625	rs9972653-rs56094641	http://www,ebi,ac,uk/efo/EFO_0010095	Other measurement	http://www,ebi,ac,uk/efo/EFO_0001444
User_trait	intercellular adhesion molecule 2 measurement	9.78653e-06	0.000264236	0.0261594	0.0625	rs651007-rs600038	http://www,ebi,ac,uk/efo/EFO_0008163	Other measurement	http://www,ebi,ac,uk/efo/EFO_0001444
User_trait	aortic valve calcification	9.78653e-06	0.000264236	0.0261594	0.0625	rs55730499-rs10455872	http://www,ebi,ac,uk/efo/EFO_0005239	Cardiovascular disease	http://www,ebi,ac,uk/efo/EFO_0000319
User_trait	repulsive guidance molecule A measurement	9.78653e-06	0.000264236	0.0261594	0.0625	rs660240-rs646776	http://www,ebi,ac,uk/efo/EFO_0008273	Other measurement	http://www,ebi,ac,uk/efo/EFO_0001444
User_trait	platelet glycoprotein 4 measurement	9.78653e-06	0.000264236	0.0261594	0.0625	rs651007-rs600038	http://www,ebi,ac,uk/efo/EFO_0008262	Other measurement	http://www,ebi,ac,uk/efo/EFO_0001444
User_trait	sugar consumption measurement	9.78653e-06	0.000264236	0.0261594	0.0625	rs11642841-rs56094641	http://www,ebi,ac,uk/efo/EFO_0010158	Other measurement	http://www,ebi,ac,uk/efo/EFO_0001444
User_trait	granulins measurement	9.78653e-06	0.000264236	0.0261594	0.0625	rs660240-rs646776	http://www,ebi,ac,uk/efo/EFO_0008141	Other measurement	http://www,ebi,ac,uk/efo/EFO_0001444
User_trait	digestive system infectious disease	9.78653e-06	0.000264236	0.0261594	0.0625	rs635634-rs600038	http://purl,obolibrary,org/obo/MONDO_0043424	Digestive system disorder	http://www,ebi,ac,uk/efo/EFO_0000405
User_trait	carbohydrate sulfotransferase 15 measurement	9.78653e-06	0.000264236	0.0261594	0.0625	rs651007-rs600038	http://www,ebi,ac,uk/efo/EFO_0008066	Other measurement	http://www,ebi,ac,uk/efo/EFO_0001444
User_trait	hepatocyte growth factor receptor measurement	9.78653e-06	0.000264236	0.0261594	0.0625	rs651007-rs600038	http://www,ebi,ac,uk/efo/EFO_0008153	Other measurement	http://www,ebi,ac,uk/efo/EFO_0001444
User_trait	glomerular filtration rate	1.03371e-05	0.00027631	0.027631	0.00786577	rs550057-rs600038|rs10850001-rs4766578	http://www,ebi,ac,uk/efo/EFO_0005208	Other measurement	http://www,ebi,ac,uk/efo/EFO_0001444
User_trait	healthspan	1.9573e-05	0.000425354	0.0523186	0.075978	rs3218020-rs7859727-rs1556516	http://www,ebi,ac,uk/efo/EFO_0009762	Other measurement	http://www,ebi,ac,uk/efo/EFO_0001444
User_trait	left ventricular structural measurement	1.9573e-05	0.000425354	0.0523186	0.075978	rs4766578-rs10774625	http://www,ebi,ac,uk/efo/EFO_0008205	Cardiovascular measurement	http://www,ebi,ac,uk/efo/EFO_0004298
User_trait	catalase measurement	1.9573e-05	0.000425354	0.0523186	0.075978	rs660240-rs646776	http://www,ebi,ac,uk/efo/EFO_0008071	Other measurement	http://www,ebi,ac,uk/efo/EFO_0001444
User_trait	COVID-19	1.9573e-05	0.000425354	0.0523186	0.075978	rs657152-rs600038	http://purl,obolibrary,org/obo/MONDO_0100096	Other disease	http://www,ebi,ac,uk/efo/EFO_0000408
User_trait	endoglin measurement	1.9573e-05	0.000425354	0.0523186	0.075978	rs651007-rs600038	http://www,ebi,ac,uk/efo/EFO_0008118	Other measurement	http://www,ebi,ac,uk/efo/EFO_0001444
User_trait	P-Selectin measurement	1.9573e-05	0.000425354	0.0523186	0.075978	rs651007-rs600038	http://www,ebi,ac,uk/efo/EFO_0008254	Other measurement	http://www,ebi,ac,uk/efo/EFO_0001444
User_trait	carotid plaque build	1.9573e-05	0.000425354	0.0523186	0.075978	rs3218020-rs9644862-rs1556516	http://www,ebi,ac,uk/efo/EFO_0006501	Cardiovascular measurement	http://www,ebi,ac,uk/efo/EFO_0004298
User_trait	height-adjusted body mass index	1.9573e-05	0.000425354	0.0523186	0.075978	rs1558902-rs56094641	http://www,ebi,ac,uk/efo/EFO_0005851	Body measurement	http://www,ebi,ac,uk/efo/EFO_0004324
User_trait	low tension glaucoma	1.9573e-05	0.000425354	0.0523186	0.075978	rs3218020-rs1333037	http://www,ebi,ac,uk/efo/EFO_1001022	Neurological disorder	http://www,ebi,ac,uk/efo/EFO_0000618
User_trait	tissue factor measurement	1.9573e-05	0.000425354	0.0523186	0.075978	rs495828-rs600038	http://www,ebi,ac,uk/efo/EFO_0010623	Other measurement	http://www,ebi,ac,uk/efo/EFO_0001444
User_trait	platelet reactivity measurement	1.9573e-05	0.000425354	0.0523186	0.075978	rs579459-rs600038	http://www,ebi,ac,uk/efo/EFO_0004985	Cardiovascular measurement	http://www,ebi,ac,uk/efo/EFO_0004298
User_trait	dilated cardiomyopathy	1.9573e-05	0.000425354	0.0523186	0.075978	rs2234962-rs17617337	http://www,ebi,ac,uk/efo/EFO_0000407	Cardiovascular disease	http://www,ebi,ac,uk/efo/EFO_0000319
User_trait	angiotensin converting enzyme activity measurement	1.9573e-05	0.000425354	0.0523186	0.075978	rs495828-rs600038	http://www,ebi,ac,uk/efo/EFO_0004463	Other measurement	http://www,ebi,ac,uk/efo/EFO_0001444
User_trait	interleukin-6 measurement	1.9573e-05	0.000425354	0.0523186	0.075978	rs643434-rs600038	http://www,ebi,ac,uk/efo/EFO_0004810	Inflammatory measurement	http://www,ebi,ac,uk/efo/EFO_0004872
User_trait	insulin receptor measurement	1.9573e-05	0.000425354	0.0523186	0.075978	rs651007-rs600038	http://www,ebi,ac,uk/efo/EFO_0008160	Other measurement	http://www,ebi,ac,uk/efo/EFO_0001444
User_trait	Tetralogy of Fallot	1.9573e-05	0.000425354	0.0523186	0.075978	rs4766578-rs11065987	http://purl,obolibrary,org/obo/HP_0001636	Other trait	http://www,ebi,ac,uk/efo/EFO_0000001
User_trait	waist-hip ratio	2.33393e-05	0.000503112	0.0623859	0.00527472	rs9923544-rs56094641|rs4766578-rs597808	http://www,ebi,ac,uk/efo/EFO_0004343	Body measurement	http://www,ebi,ac,uk/efo/EFO_0004324
User_trait	FEV/FEC ratio	2.47791e-05	0.000529877	0.0662347	0.00512136	rs4746140-rs4745723|rs2234962-rs17617337	http://www,ebi,ac,uk/efo/EFO_0004713	Other measurement	http://www,ebi,ac,uk/efo/EFO_0001444
User_trait	eosinophil count	2.79284e-05	0.000572828	0.0746527	0.00482785	rs2519093-rs600038|rs4766578-rs10774624	http://www,ebi,ac,uk/efo/EFO_0004842	Hematological measurement	http://www,ebi,ac,uk/efo/EFO_0004503
User_trait	phytosterol measurement	2.93593e-05	0.000572828	0.0784775	0.0766721	rs657152-rs600038	http://www,ebi,ac,uk/efo/EFO_0004862	Other measurement	http://www,ebi,ac,uk/efo/EFO_0001444
User_trait	leptin measurement	2.93593e-05	0.000572828	0.0784775	0.0766721	rs8043757-rs56094641	http://www,ebi,ac,uk/efo/EFO_0005000	Other measurement	http://www,ebi,ac,uk/efo/EFO_0001444
User_trait	ankle brachial index	2.93593e-05	0.000572828	0.0784775	0.0766721	rs1333045-rs1556516	http://www,ebi,ac,uk/efo/EFO_0003912	Cardiovascular measurement	http://www,ebi,ac,uk/efo/EFO_0004298
User_trait	platelet endothelial cell adhesion molecule measurement	2.93593e-05	0.000572828	0.0784775	0.0766721	rs635634-rs600038	http://www,ebi,ac,uk/efo/EFO_0010598	Other measurement	http://www,ebi,ac,uk/efo/EFO_0001444
User_trait	toll-like receptor 4:Lymphocyte antigen 96 complex measurement	2.93593e-05	0.000572828	0.0784775	0.0766721	rs651007-rs600038	http://www,ebi,ac,uk/efo/EFO_0008301	Other measurement	http://www,ebi,ac,uk/efo/EFO_0001444
User_trait	cadherin-5 measurement	2.93593e-05	0.000572828	0.0784775	0.0766721	rs651007-rs600038	http://www,ebi,ac,uk/efo/EFO_0008060	Other measurement	http://www,ebi,ac,uk/efo/EFO_0001444
User_trait	vascular endothelial growth factor receptor 2 measurement	2.93593e-05	0.000572828	0.0784775	0.0766721	rs651007-rs600038	http://www,ebi,ac,uk/efo/EFO_0008314	Other measurement	http://www,ebi,ac,uk/efo/EFO_0001444
User_trait	QRS complex	2.93593e-05	0.000572828	0.0784775	0.0766721	rs3176326-rs4135240-rs1321311	http://www,ebi,ac,uk/efo/EFO_0005054	Cardiovascular measurement	http://www,ebi,ac,uk/efo/EFO_0004298
User_trait	CD109 antigen measurement	2.93593e-05	0.000572828	0.0784775	0.0766721	rs651007-rs600038	http://www,ebi,ac,uk/efo/EFO_0008076	Other measurement	http://www,ebi,ac,uk/efo/EFO_0001444
User_trait	mean corpuscular hemoglobin	3.75959e-05	0.000707349	0.100494	0.00416831	rs56094641|rs4766578-rs597808	http://www,ebi,ac,uk/efo/EFO_0004527	Hematological measurement	http://www,ebi,ac,uk/efo/EFO_0004503
User_trait	energy intake	3.91456e-05	0.000707349	0.104636	0.0748516	rs56094641-rs1421085	http://www,ebi,ac,uk/efo/EFO_0003939	Biological process	http://purl,obolibrary,org/obo/GO_0008150
User_trait	aortic stenosis	3.91456e-05	0.000707349	0.104636	0.0748516	rs55730499-rs10455872	http://www,ebi,ac,uk/efo/EFO_0000266	Cardiovascular disease	http://www,ebi,ac,uk/efo/EFO_0000319
User_trait	left ventricular ejection fraction measurement	3.91456e-05	0.000707349	0.104636	0.0748516	rs72840788-rs17617337	http://www,ebi,ac,uk/efo/EFO_0008373	Cardiovascular measurement	http://www,ebi,ac,uk/efo/EFO_0004298
User_trait	response to statin	3.91456e-05	0.000707349	0.104636	0.0748516	rs55730499-rs10455872	http://purl,obolibrary,org/obo/GO_0036273	Response to drug	http://purl,obolibrary,org/obo/GO_0042493
User_trait	small vessel stroke	3.91456e-05	0.000707349	0.104636	0.0748516	rs4766578-rs11065979	http://www,ebi,ac,uk/efo/EFO_1001504	Cardiovascular disease	http://www,ebi,ac,uk/efo/EFO_0000319
User_trait	erythrocyte count	3.91649e-05	0.000707349	0.104688	0.00408482	rs550057-rs600038|rs3184504-rs4766578	http://www,ebi,ac,uk/efo/EFO_0004305	Hematological measurement	http://www,ebi,ac,uk/efo/EFO_0004503
User_trait	vascular endothelial growth factor receptor 3 measurement	4.89318e-05	0.000838427	0.130795	0.0722918	rs651007-rs600038	http://www,ebi,ac,uk/efo/EFO_0008315	Other measurement	http://www,ebi,ac,uk/efo/EFO_0001444
User_trait	longitudinal BMI measurement	4.89318e-05	0.000838427	0.130795	0.0722918	rs1558902-rs56094641	http://www,ebi,ac,uk/efo/EFO_0005937	Body measurement	http://www,ebi,ac,uk/efo/EFO_0004324
User_trait	base metabolic rate measurement	4.89318e-05	0.000838427	0.130795	0.0722918	rs56094641-rs1421085	http://www,ebi,ac,uk/efo/EFO_0007777	Other measurement	http://www,ebi,ac,uk/efo/EFO_0001444
User_trait	e-selectin measurement	4.89318e-05	0.000838427	0.130795	0.0722918	rs2519093-rs600038	http://www,ebi,ac,uk/efo/EFO_0004575	Inflammatory measurement	http://www,ebi,ac,uk/efo/EFO_0004872
User_trait	carotid atherosclerosis	4.89318e-05	0.000838427	0.130795	0.0722918	rs3218020-rs9632884-rs1556516	http://www,ebi,ac,uk/efo/EFO_0009783	Cardiovascular disease	http://www,ebi,ac,uk/efo/EFO_0000319
User_trait	thyroid peroxidase antibody measurement	4.89318e-05	0.000838427	0.130795	0.0722918	rs4766578-rs653178	http://www,ebi,ac,uk/efo/EFO_0005666	Other measurement	http://www,ebi,ac,uk/efo/EFO_0001444
User_trait	LDL cholesterol change measurement	5.87178e-05	0.000974862	0.156953	0.0695448	rs660240-rs629301	http://www,ebi,ac,uk/efo/EFO_0007804	Lipid or lipoprotein measurement	http://www,ebi,ac,uk/efo/EFO_0004732
User_trait	left ventricular systolic function measurement	5.87178e-05	0.000974862	0.156953	0.0695448	rs72840788-rs17617337	http://www,ebi,ac,uk/efo/EFO_0008206	Cardiovascular measurement	http://www,ebi,ac,uk/efo/EFO_0004298
User_trait	ICAM-1 measurement	5.87178e-05	0.000974862	0.156953	0.0695448	rs600038-rs507666	http://www,ebi,ac,uk/efo/EFO_0004520	Cardiovascular measurement	http://www,ebi,ac,uk/efo/EFO_0004298
User_trait	subcutaneous adipose tissue measurement	5.87178e-05	0.000974862	0.156953	0.0695448	rs7185735-rs56094641	http://www,ebi,ac,uk/efo/EFO_0004766	Other measurement	http://www,ebi,ac,uk/efo/EFO_0001444
User_trait	protein measurement	6.85038e-05	0.00111653	0.183111	0.0668183	rs644234-rs600038	http://www,ebi,ac,uk/efo/EFO_0004747	Other measurement	http://www,ebi,ac,uk/efo/EFO_0001444
User_trait	glioblastoma multiforme	6.85038e-05	0.00111653	0.183111	0.0668183	rs1556516-rs145929329	http://www,ebi,ac,uk/efo/EFO_0000519	Cancer	http://www,ebi,ac,uk/efo/EFO_0000616
User_trait	left ventricular diastolic function measurement	6.85038e-05	0.00111653	0.183111	0.0668183	rs4766578-rs7310615	http://www,ebi,ac,uk/efo/EFO_0008204	Cardiovascular measurement	http://www,ebi,ac,uk/efo/EFO_0004298
User_trait	malaria	7.82897e-05	0.0012531	0.209268	0.0641962	rs8176719-rs600038	http://www,ebi,ac,uk/efo/EFO_0001068	Digestive system disorder	http://www,ebi,ac,uk/efo/EFO_0000405
User_trait	cardioembolic stroke	7.82897e-05	0.0012531	0.209268	0.0641962	rs13143308-rs4307025-rs17042102	http://www,ebi,ac,uk/efo/EFO_1001976	Cardiovascular disease	http://www,ebi,ac,uk/efo/EFO_0000319
User_trait	fat body mass	8.80755e-05	0.00140134	0.235426	0.0617109	rs9972653-rs56094641	http://www,ebi,ac,uk/efo/EFO_0005409	Other measurement	http://www,ebi,ac,uk/efo/EFO_0001444
User_trait	glioma	0.000107647	0.00169259	0.28774	0.0571776	rs3218020-rs634537	http://www,ebi,ac,uk/efo/EFO_0005543	Cancer	http://www,ebi,ac,uk/efo/EFO_0000616
User_trait	serum IgA measurement	0.000117432	0.0017937	0.313897	0.0551218	rs3184504-rs4766578	http://www,ebi,ac,uk/efo/EFO_0004912	Other measurement	http://www,ebi,ac,uk/efo/EFO_0001444
User_trait	heart function measurement	0.000117432	0.0017937	0.313897	0.0551218	rs3176326-rs9470361-rs4135240	http://www,ebi,ac,uk/efo/EFO_0004311	Cardiovascular measurement	http://www,ebi,ac,uk/efo/EFO_0004298
User_trait	beta-2 microglobulin measurement	0.000117432	0.0017937	0.313897	0.0551218	rs3184504-rs4766578	http://www,ebi,ac,uk/efo/EFO_0005197	Other measurement	http://www,ebi,ac,uk/efo/EFO_0001444
User_trait	obese body mass index status	0.000137003	0.00205736	0.36621	0.0513908	rs9928094-rs56094641	http://www,ebi,ac,uk/efo/EFO_0007041	Body measurement	http://www,ebi,ac,uk/efo/EFO_0004324
User_trait	progranulin measurement	0.000137003	0.00205736	0.36621	0.0513908	rs660240	http://www,ebi,ac,uk/efo/EFO_0004625	Other measurement	http://www,ebi,ac,uk/efo/EFO_0001444
User_trait	Antiglaucoma preparations and miotics use measurement	0.000137003	0.00205736	0.36621	0.0513908	rs3218020-rs1360589	http://www,ebi,ac,uk/efo/EFO_0009944	Other measurement	http://www,ebi,ac,uk/efo/EFO_0001444
User_trait	immune system disease	0.000146789	0.00217981	0.392366	0.0496972	rs4766578-rs653178	http://www,ebi,ac,uk/efo/EFO_0000540	Other disease	http://www,ebi,ac,uk/efo/EFO_0000408
User_trait	eye measurement	0.000146789	0.00217981	0.392366	0.0496972	rs4766578-rs10774625	http://www,ebi,ac,uk/efo/EFO_0004731	Other measurement	http://www,ebi,ac,uk/efo/EFO_0001444
User_trait	urolithiasis	0.000156574	0.00231227	0.418522	0.0481064	rs56094641-rs7206790	http://purl,obolibrary,org/obo/MONDO_0024647	Other disease	http://www,ebi,ac,uk/efo/EFO_0000408
User_trait	Sarcoidosis	0.000185929	0.00268642	0.496988	0.0438725	rs4766578-rs653178	http://www,orpha,net/ORDO/Orphanet_797	Other disease	http://www,ebi,ac,uk/efo/EFO_0000408
User_trait	serum carcinoembryonic antigen measurement	0.000185929	0.00268642	0.496988	0.0438725	rs635634-rs600038	http://www,ebi,ac,uk/efo/EFO_0005760	Other measurement	http://www,ebi,ac,uk/efo/EFO_0001444
User_trait	immunoglobulin isotype switching measurement	0.000195714	0.00273897	0.523142	0.0426176	rs1265565-rs4766578	http://www,ebi,ac,uk/efo/EFO_0010128	Other measurement	http://www,ebi,ac,uk/efo/EFO_0001444
User_trait	central nervous system cancer	0.000195714	0.00273897	0.523142	0.0426176	rs3218020-rs2157719	http://www,ebi,ac,uk/efo/EFO_0000326	Cancer	http://www,ebi,ac,uk/efo/EFO_0000616
User_trait	endometrial carcinoma	0.000195714	0.00273897	0.523142	0.0426176	rs3184504-rs4766578	http://www,ebi,ac,uk/efo/EFO_1001512	Cancer	http://www,ebi,ac,uk/efo/EFO_0000616
User_trait	body mass index	0.000199632	0.00277925	0.533617	0.00181615	rs4766578-rs17630235|rs9937053-rs56094641	http://www,ebi,ac,uk/efo/EFO_0004340	Body measurement	http://www,ebi,ac,uk/efo/EFO_0004324
User_trait	susceptibility to childhood ear infection measurement	0.000205498	0.00280254	0.549297	0.0414309	rs8176643-rs600038	http://www,ebi,ac,uk/efo/EFO_0007904	Other measurement	http://www,ebi,ac,uk/efo/EFO_0001444
User_trait	type 2 diabetes nephropathy	0.000215283	0.00292107	0.575451	0.0403072	rs56094641	NA	NA	NA
User_trait	gastroesophageal reflux disease	0.000244636	0.00326956	0.653913	0.0372688	rs4766578-rs597808	http://www,ebi,ac,uk/efo/EFO_0003948	Digestive system disorder	http://www,ebi,ac,uk/efo/EFO_0000405
User_trait	factor VIII measurement	0.000254421	0.00335008	0.680066	0.036354	rs8176719-rs600038	http://www,ebi,ac,uk/efo/EFO_0004630	Hematological measurement	http://www,ebi,ac,uk/efo/EFO_0004503
User_trait	urinary metabolite measurement	0.000254421	0.00335008	0.680066	0.036354	rs579459-rs600038	http://www,ebi,ac,uk/efo/EFO_0005116	Other measurement	http://www,ebi,ac,uk/efo/EFO_0001444
User_trait	sclerosing cholangitis	0.000273989	0.00359006	0.732372	0.0346512	rs3184504-rs4766578	http://www,ebi,ac,uk/efo/EFO_0004268	Digestive system disorder	http://www,ebi,ac,uk/efo/EFO_0000405
User_trait	body weight	0.000313124	0.0040047	0.836982	0.0316795	rs8050136-rs56094641	http://www,ebi,ac,uk/efo/EFO_0004338	Body measurement	http://www,ebi,ac,uk/efo/EFO_0004324
User_trait	optic cup area measurement	0.000332692	0.00419474	0.889285	0.0303756	rs3218020-rs1360589	http://www,ebi,ac,uk/efo/EFO_0006940	Other measurement	http://www,ebi,ac,uk/efo/EFO_0001444
User_trait	estrogen-receptor negative breast cancer	0.000332692	0.00419474	0.889285	0.0303756	rs56094641-rs17817449	http://www,ebi,ac,uk/efo/EFO_1000650	Cancer	http://www,ebi,ac,uk/efo/EFO_0000616
User_trait	lipid measurement	0.000332692	0.00419474	0.889285	0.0303756	rs660240-rs646776	http://www,ebi,ac,uk/efo/EFO_0004529	Other measurement	http://www,ebi,ac,uk/efo/EFO_0001444
User_trait	coronary artery calcification	0.000352259	0.00439994	0.941587	0.0291741	rs1556516-rs1333049	http://www,ebi,ac,uk/efo/EFO_0004723	Other trait	http://www,ebi,ac,uk/efo/EFO_0000001
User_trait	von Willebrand factor measurement	0.000381608	0.00467908	1	0.0275392	rs8176719-rs600038	http://www,ebi,ac,uk/efo/EFO_0004629	Hematological measurement	http://www,ebi,ac,uk/efo/EFO_0004503
User_trait	brain aneurysm	0.000381608	0.00467908	1	0.0275392	rs3218020-rs1556516-rs1333040	http://www,ebi,ac,uk/efo/EFO_0003870	Cardiovascular disease	http://www,ebi,ac,uk/efo/EFO_0000319
User_trait	physical activity measurement	0.000430522	0.00525473	1	0.0251854	rs55872725-rs56094641	http://www,ebi,ac,uk/efo/EFO_0008002	Other measurement	http://www,ebi,ac,uk/efo/EFO_0001444
User_trait	QRS duration	0.00045987	0.00558742	1	0.0239562	rs3176326-rs9470361-rs4135240	http://www,ebi,ac,uk/efo/EFO_0005055	Cardiovascular measurement	http://www,ebi,ac,uk/efo/EFO_0004298
User_trait	coffee consumption measurement	0.000469652	0.00565487	1	0.0235726	rs9937053-rs56094641	http://www,ebi,ac,uk/efo/EFO_0006781	Other measurement	http://www,ebi,ac,uk/efo/EFO_0001444
User_trait	obesity	0.000489217	0.00586402	1	0.0228411	rs8043757-rs56094641	http://www,ebi,ac,uk/efo/EFO_0001073	Metabolic disorder	http://www,ebi,ac,uk/efo/EFO_0000589
User_trait	fasting blood glucose measurement	0.000538126	0.00639294	1	0.0211961	rs651007-rs600038	http://www,ebi,ac,uk/efo/EFO_0004465	Other measurement	http://www,ebi,ac,uk/efo/EFO_0001444
User_trait	fibrinogen measurement	0.000547907	0.00648034	1	0.0208951	rs4766578-rs7310615	http://www,ebi,ac,uk/efo/EFO_0004623	Hematological measurement	http://www,ebi,ac,uk/efo/EFO_0004503
User_trait	Drugs used in diabetes use measurement	0.000557689	0.00656697	1	0.0206024	rs56094641	http://www,ebi,ac,uk/efo/EFO_0009924	Other measurement	http://www,ebi,ac,uk/efo/EFO_0001444
User_trait	snoring measurement	0.000587033	0.00688219	1	0.0197717	rs8047587-rs56094641	http://www,ebi,ac,uk/efo/EFO_0008341	Other measurement	http://www,ebi,ac,uk/efo/EFO_0001444
User_trait	sodium measurement	0.000616376	0.00719464	1	0.0190053	rs11642015-rs56094641	http://www,ebi,ac,uk/efo/EFO_0009282	Other measurement	http://www,ebi,ac,uk/efo/EFO_0001444
User_trait	waist circumference	0.000626157	0.0072143	1	0.0187628	rs56094641-rs1421085	http://www,ebi,ac,uk/efo/EFO_0004342	Body measurement	http://www,ebi,ac,uk/efo/EFO_0004324
User_trait	Vitiligo	0.000626157	0.0072143	1	0.0187628	rs4766578-rs10774624	http://www,ebi,ac,uk/efo/EFO_0004208	Immune system disorder	http://www,ebi,ac,uk/efo/EFO_0000540
User_trait	reaction time measurement	0.000626157	0.0072143	1	0.0187628	rs4766578	http://www,ebi,ac,uk/efo/EFO_0008393	Other measurement	http://www,ebi,ac,uk/efo/EFO_0001444
User_trait	type I diabetes mellitus	0.000694621	0.00786746	1	0.0172243	rs4766578-rs653178	http://www,ebi,ac,uk/efo/EFO_0001359	Metabolic disorder	http://www,ebi,ac,uk/efo/EFO_0000589
User_trait	celiac disease	0.000694621	0.00786746	1	0.0172243	rs3184504-rs4766578	http://www,ebi,ac,uk/efo/EFO_0001060	Immune system disorder	http://www,ebi,ac,uk/efo/EFO_0000540
User_trait	primary biliary cirrhosis	0.000714181	0.00805488	1	0.01683	rs4766578-rs11065979	http://www,ebi,ac,uk/efo/EFO_1001486	Cancer	http://www,ebi,ac,uk/efo/EFO_0000616
User_trait	hip circumference	0.0007533	0.00846038	1	0.0160931	rs56094641-rs1421085	http://www,ebi,ac,uk/efo/EFO_0005093	Body measurement	http://www,ebi,ac,uk/efo/EFO_0004324
User_trait	keratinocyte carcinoma	0.00076308	0.0084988	1	0.0159188	rs3218020-rs7874604	http://www,ebi,ac,uk/efo/EFO_0010176	Cancer	http://www,ebi,ac,uk/efo/EFO_0000616
User_trait	basal cell carcinoma	0.000811977	0.00900587	1	0.0151011	rs3218020-rs7874604	http://www,ebi,ac,uk/efo/EFO_0004193	Cancer	http://www,ebi,ac,uk/efo/EFO_0000616
User_trait	nasopharyngeal neoplasm	0.000841314	0.00925445	1	0.0146496	rs3218020-rs1412829	http://www,ebi,ac,uk/efo/EFO_0004252	Cancer	http://www,ebi,ac,uk/efo/EFO_0000616
User_trait	body fat percentage	0.000880428	0.00960565	1	0.0140879	rs62033406-rs56094641	http://www,ebi,ac,uk/efo/EFO_0007800	Body measurement	http://www,ebi,ac,uk/efo/EFO_0004324
User_trait	peak expiratory flow	0.000880428	0.00960565	1	0.0140879	rs4746140-rs60820984	http://www,ebi,ac,uk/efo/EFO_0009718	Other measurement	http://www,ebi,ac,uk/efo/EFO_0001444
User_trait	alkaline phosphatase measurement	0.000919542	0.0099916	1	0.0135677	rs600038-rs2519093-rs657152	http://www,ebi,ac,uk/efo/EFO_0004533	Liver enzyme measurement	http://www,ebi,ac,uk/efo/EFO_0004582
User_trait	autoimmune disease	0.000948876	0.0102686	1	0.013202	rs4766578-rs7310615	http://www,ebi,ac,uk/efo/EFO_0005140	Immune system disorder	http://www,ebi,ac,uk/efo/EFO_0000540
User_trait	basophil count	0.000997764	0.0107541	1	0.0126345	rs4766578-rs11065979	http://www,ebi,ac,uk/efo/EFO_0005090	Inflammatory measurement	http://www,ebi,ac,uk/efo/EFO_0004872
User_trait	body fat distribution	0.00101732	0.0109209	1	0.0124209	rs55872725-rs56094641	http://www,ebi,ac,uk/efo/EFO_0004341	Body measurement	http://www,ebi,ac,uk/efo/EFO_0004324
User_trait	sleep duration	0.00113464	0.0120353	1	0.011277	rs8047587-rs56094641	http://www,ebi,ac,uk/efo/EFO_0005271	Other measurement	http://www,ebi,ac,uk/efo/EFO_0001444
User_trait	risky sexual behaviour measurement	0.00115419	0.0121943	1	0.0111065	rs72805613-rs56094641	http://www,ebi,ac,uk/efo/EFO_0007877	Other measurement	http://www,ebi,ac,uk/efo/EFO_0001444
User_trait	optic disc size measurement	0.00121285	0.0127635	1	0.0106246	rs3218020-rs7865618	http://www,ebi,ac,uk/efo/EFO_0004832	Other measurement	http://www,ebi,ac,uk/efo/EFO_0001444
User_trait	cup-to-disc ratio measurement	0.0012324	0.0129184	1	0.0104732	rs3218020-rs944801	http://www,ebi,ac,uk/efo/EFO_0006939	Other measurement	http://www,ebi,ac,uk/efo/EFO_0001444
User_trait	Thyroid preparation use measurement	0.00129105	0.0134279	1	0.0100436	rs3184504-rs4766578	http://www,ebi,ac,uk/efo/EFO_0009933	Other measurement	http://www,ebi,ac,uk/efo/EFO_0001444
User_trait	metabolic syndrome	0.00129105	0.0134279	1	0.0100436	rs56094641	http://www,ebi,ac,uk/efo/EFO_0000195	Metabolic disorder	http://www,ebi,ac,uk/efo/EFO_0000589
User_trait	neutrophil percentage of leukocytes	0.00132037	0.0136268	1	0.00984175	rs4766578-rs111338191	http://www,ebi,ac,uk/efo/EFO_0007990	Hematological measurement	http://www,ebi,ac,uk/efo/EFO_0004503
User_trait	Parkinson's disease	0.00132037	0.0136268	1	0.00984175	rs72840788-rs17617337	http://www,ebi,ac,uk/efo/EFO_0002508	Neurological disorder	http://www,ebi,ac,uk/efo/EFO_0000618
User_trait	macula measurement	0.00133014	0.0136749	1	0.00977626	rs4645630-rs1556516	http://www,ebi,ac,uk/efo/EFO_0008375	Other measurement	http://www,ebi,ac,uk/efo/EFO_0001444
User_trait	venous thromboembolism	0.00142788	0.0146235	1	0.0091663	rs9411377-rs600038	http://www,ebi,ac,uk/efo/EFO_0004286	Cardiovascular disease	http://www,ebi,ac,uk/efo/EFO_0000319
User_trait	lymphocyte percentage of leukocytes	0.00143766	0.0146674	1	0.00910946	rs4766578-rs111338191	http://www,ebi,ac,uk/efo/EFO_0007993	Hematological measurement	http://www,ebi,ac,uk/efo/EFO_0004503
User_trait	grip strength measurement	0.0014572	0.0148103	1	0.00899787	rs11642015-rs56094641	http://www,ebi,ac,uk/efo/EFO_0006941	Other measurement	http://www,ebi,ac,uk/efo/EFO_0001444
User_trait	hypothyroidism	0.00148652	0.015051	1	0.00883552	rs3184504-rs4766578	http://www,ebi,ac,uk/efo/EFO_0004705	Other disease	http://www,ebi,ac,uk/efo/EFO_0000408
User_trait	rheumatoid arthritis	0.00159402	0.0160181	1	0.00828725	rs4766578-rs10774624	http://www,ebi,ac,uk/efo/EFO_0000685	Immune system disorder	http://www,ebi,ac,uk/efo/EFO_0000540
User_trait	lean body mass	0.00159402	0.0160181	1	0.00828725	rs56094641-rs1421085	http://www,ebi,ac,uk/efo/EFO_0004995	Other measurement	http://www,ebi,ac,uk/efo/EFO_0001444
User_trait	neutrophil percentage of granulocytes	0.00166242	0.0166429	1	0.00797243	rs4766578-rs653178	http://www,ebi,ac,uk/efo/EFO_0007994	Hematological measurement	http://www,ebi,ac,uk/efo/EFO_0004503
User_trait	systemic lupus erythematosus	0.00168196	0.0167757	1	0.00788682	rs4766578-rs597808	http://www,ebi,ac,uk/efo/EFO_0002690	Immune system disorder	http://www,ebi,ac,uk/efo/EFO_0000540
User_trait	psoriasis	0.00177967	0.0176842	1	0.00748497	rs4766578-rs11065979	http://www,ebi,ac,uk/efo/EFO_0000676	Immune system disorder	http://www,ebi,ac,uk/efo/EFO_0000540
User_trait	eosinophil percentage of granulocytes	0.00179921	0.0178122	1	0.00740946	rs4766578-rs653178	http://www,ebi,ac,uk/efo/EFO_0007996	Hematological measurement	http://www,ebi,ac,uk/efo/EFO_0004503
User_trait	eosinophil percentage of leukocytes	0.00193598	0.0190253	1	0.00692074	rs4766578-rs653178	http://www,ebi,ac,uk/efo/EFO_0007991	Hematological measurement	http://www,ebi,ac,uk/efo/EFO_0004503
User_trait	lymphocyte count	0.00193598	0.0190253	1	0.00692074	rs3184504-rs4766578	http://www,ebi,ac,uk/efo/EFO_0004587	Hematological measurement	http://www,ebi,ac,uk/efo/EFO_0004503
User_trait	forced expiratory volume	0.00199459	0.0195295	1	0.00673048	rs4746140-rs60820984	http://www,ebi,ac,uk/efo/EFO_0004314	Other measurement	http://www,ebi,ac,uk/efo/EFO_0001444
User_trait	diet measurement	0.00204343	0.0198622	1	0.00657974	rs56094641	http://www,ebi,ac,uk/efo/EFO_0008111	Other measurement	http://www,ebi,ac,uk/efo/EFO_0001444
User_trait	visceral adipose tissue measurement	0.00206297	0.0199794	1	0.00652132	rs56094641	http://www,ebi,ac,uk/efo/EFO_0004765	Other measurement	http://www,ebi,ac,uk/efo/EFO_0001444
User_trait	inflammatory bowel disease	0.00210204	0.0202843	1	0.00640754	rs3184504-rs4766578	http://www,ebi,ac,uk/efo/EFO_0003767	Digestive system disorder	http://www,ebi,ac,uk/efo/EFO_0000405
User_trait	smoking behavior	0.00224854	0.0215425	1	0.00601403	rs4766578-rs597808	http://www,ebi,ac,uk/efo/EFO_0004318	Biological process	http://purl,obolibrary,org/obo/GO_0008150
User_trait	birth weight	0.0022876	0.0218384	1	0.00591712	rs3184504-rs4766578	http://www,ebi,ac,uk/efo/EFO_0004344	Body measurement	http://www,ebi,ac,uk/efo/EFO_0004324
User_trait	smoking initiation	0.00235596	0.022411	1	0.00575485	rs4766578	http://www,ebi,ac,uk/efo/EFO_0005670	Biological process	http://purl,obolibrary,org/obo/GO_0008150
User_trait	childhood onset asthma	0.00251219	0.0238123	1	0.00541538	rs4766578-rs11065979	http://www,ebi,ac,uk/efo/EFO_0004591	Other disease	http://www,ebi,ac,uk/efo/EFO_0000408
User_trait	multiple sclerosis	0.00252195	0.0238204	1	0.00539549	rs3184504-rs4766578	http://www,ebi,ac,uk/efo/EFO_0003885	Immune system disorder	http://www,ebi,ac,uk/efo/EFO_0000540
User_trait	alcohol consumption measurement	0.00255124	0.0240122	1	0.00533668	rs56094641-rs1421085	http://www,ebi,ac,uk/efo/EFO_0007878	Other measurement	http://www,ebi,ac,uk/efo/EFO_0001444
User_trait	monocyte count	0.00262934	0.0246605	1	0.00518595	rs4766578-rs653178	http://www,ebi,ac,uk/efo/EFO_0005091	Hematological measurement	http://www,ebi,ac,uk/efo/EFO_0004503
User_trait	platelet crit	0.00265863	0.024848	1	0.00513159	rs3184504-rs4766578	http://www,ebi,ac,uk/efo/EFO_0007985	Hematological measurement	http://www,ebi,ac,uk/efo/EFO_0004503
User_trait	intraocular pressure measurement	0.00338079	0.0314873	1	0.00407745	rs4766578-rs10774624	http://www,ebi,ac,uk/efo/EFO_0004695	Other measurement	http://www,ebi,ac,uk/efo/EFO_0001444
User_trait	platelet count	0.00361489	0.0335507	1	0.00382276	rs3184504-rs4766578	http://www,ebi,ac,uk/efo/EFO_0004309	Hematological measurement	http://www,ebi,ac,uk/efo/EFO_0004503
User_trait	reticulocyte count	0.00370267	0.0342465	1	0.00373527	rs3184504-rs4766578	http://www,ebi,ac,uk/efo/EFO_0007986	Hematological measurement	http://www,ebi,ac,uk/efo/EFO_0004503
User_trait	asthma	0.00421943	0.0388915	1	0.00329161	rs4766578-rs653178	http://www,ebi,ac,uk/efo/EFO_0000270	Other disease	http://www,ebi,ac,uk/efo/EFO_0000408
User_trait	appendicular lean mass	0.00424868	0.0390265	1	0.00326963	rs56094641-rs28429148	http://www,ebi,ac,uk/efo/EFO_0004980	Other measurement	http://www,ebi,ac,uk/efo/EFO_0001444
User_trait	hair colour measurement	0.0043364	0.0396959	1	0.00320541	rs3218020-rs10811650-rs1556516	http://www,ebi,ac,uk/efo/EFO_0007822	Other measurement	http://www,ebi,ac,uk/efo/EFO_0001444
User_trait	chronotype measurement	0.00576821	0.0526226	1	0.00242686	rs56094641-rs1421085	http://www,ebi,ac,uk/efo/EFO_0008328	Other measurement	http://www,ebi,ac,uk/efo/EFO_0001444
User_trait	vital capacity	0.00580715	0.0527976	1	0.00241092	rs550057-rs600038	http://www,ebi,ac,uk/efo/EFO_0004312	Other measurement	http://www,ebi,ac,uk/efo/EFO_0001444
User_trait	smoking status measurement	0.00739249	0.0669834	1	0.00190202	rs4766578	http://www,ebi,ac,uk/efo/EFO_0006527	Other measurement	http://www,ebi,ac,uk/efo/EFO_0001444
User_trait	red blood cell distribution width	0.00748967	0.0676347	1	0.00187771	rs1558902-rs56094641	http://www,ebi,ac,uk/efo/EFO_0005192	Hematological measurement	http://www,ebi,ac,uk/efo/EFO_0004503
User_trait	adolescent idiopathic scoliosis	0.00849013	0.0764112	1	0.00165922	rs12149832-rs56094641	http://www,ebi,ac,uk/efo/EFO_0005423	Other disease	http://www,ebi,ac,uk/efo/EFO_0000408

## Sheet: ST7
Supplementary Table 7. Results of multi-variate MR corrected for cardiovascular traits
Gene	Exposure	Estimate	se	pvalue
BAG3	Interval	-0.063	0.077	0.417
	DBP	0.209	0.087	0.016
BAG3	Interval	-0.141	0.052	0.007
	SBP	0.137	0.057	0.016
MIF	Interval	0.259	0.168	0.124
	CAD	-0.548	1.083	0.613
APOA5	Interval	-0.008	0.035	0.811
	CAD	0.744	0.209	0.000

## Sheet: ST8
Supplementary Table 8. Therapeutic Target Database (TTD) for the causal candidate proteins
Gene	Target info	Target name	Target type	disease	drugs	drug info
ABO	T53103	Alpha-N-acetylglucosaminidase (NAGLU)	Successful Target	Autoimmune diabetes; Mucopolysaccharidosis	N-Acetyl-D-glucosamine	http://db.idrblab.net/ttd/data/drug/details/d05zym
ABO	T64645	N-sulphoglucosamine sulphohydrolase (SGSH)	Clinical trial Target	Mucopolysaccharidosis; Sanfilippo syndrome	LYS-SAF302	http://db.idrblab.net/ttd/data/drug/details/d5dar1
BAG3	NA	NA	NA	NA	NA	NA
FLT4	T07303	Vascular endothelial growth factor receptor 3 (FLT-4)	Successful Target	Vascular endothelial growth factor receptor 3 (FLT-4)	Tivozanib	http://db.idrblab.net/ttd/data/drug/details/d0w7jz
FLT4	T51425	Vascular endothelial growth factor C (VEGFC)	Clinical trial Target	Vascular endothelial growth factor C (VEGFC)	OPT-302	http://db.idrblab.net/ttd/data/drug/details/dna7i1
TDGF1	T47864	Teratocarcinoma-derived growth factor 1 (TDGF1)	Clinical trial Target	Solid tumour/cancer	BIIB 015	http://db.idrblab.net/ttd/data/drug/details/d08irg
FUT3	T00750	Galactoside 3(4)-L-fucosyltransferase (FUT3)	Clinical trial Target	Fallopian tube cancer	Rebmab-100	http://db.idrblab.net/ttd/data/drug/details/d0i3os
FSTL1	NA	NA	NA	NA	NA	NA
ALDH3A1	NA	NA	NA	NA	NA	NA
GLCE	NA	NA	NA	NA	NA	NA
PTHLH	NA	NA	NA	NA	NA	NA
CDON	NA	NA	NA	NA	NA	NA
FCGR2A	T22212	Immunoglobulin gamma Fc receptor IIA (FCGR2A)	Successful Target	Idiopathic thrombocytopenic purpura; Systemic lupus erythematosus;	SM-101	http://db.idrblab.net/ttd/data/drug/details/d0h6vy
FCGR2A	T52629	Immunoglobulin gamma Fc receptor II (FCGR2)	Literature-reported Target	NA	NA	NA
RGMB	NA	NA	NA	NA	NA	NA
AMH	T36440	Anti-mullerian hormone II receptor (AMHR2)	Literature-reported Target	NA	NA	NA
MIF	T39977	Macrophage migration inhibitory factor (MIF)	Clinical trial Target	Thrombocytopenia; Autoimmune diabetes;	3,4-Dihydroxycinnamic Acid	http://db.idrblab.net/ttd/data/drug/details/d0v9en
MIF	T78393	MIF messenger RNA (MIF mRNA)	Literature-reported Target	Solid tumour/cancer;	ISIS 112690	http://db.idrblab.net/ttd/data/drug/details/d01dcz
IL15RA	T48429	Interleukin 15 receptor alpha (IL15RA)	Clinical trial Target	Acute myeloid leukaemia; Bladder cancer;	ALT-803	http://db.idrblab.net/ttd/data/drug/details/d0fd7h
B3GAT3	NA	NA	NA	NA	NA	NA
CCDC126	NA	NA	NA	NA	NA	NA
ST3GAL6	NA	NA	NA	NA	NA	NA
APOA5	NA	NA	NA	NA	NA	NA

## Sheet: ST9
Supplementary Table 9. Drug Gene interaction Database (DGIdb) for the causal candidate proteins
gene	drug	interaction_types	sources	pmids
FLT4	CEP-5214	inhibitor	DTC|ChemblInteractions	14640546
FLT4	VANDETANIB	inhibitor	TALC|TdgClinicalTrial|ClearityFoundationClinicalTrial|ChemblInteractions|MyCancerGenomeClinicalTrial
FLT4	OSI-930	inhibitor	ChemblInteractions
FLT4	XL-820	inhibitor	ChemblInteractions
FLT4	NINTEDANIB	inhibitor	TALC|MyCancerGenome|TdgClinicalTrial|ClearityFoundationClinicalTrial|GuideToPharmacology	18559524|31016670
FLT4	LINIFANIB	inhibitor	DTC|MyCancerGenome|TdgClinicalTrial|ChemblInteractions|GuideToPharmacology|TTD
FLT4	ORANTINIB	inhibitor	MyCancerGenome
FLT4	PAZOPANIB	inhibitor	TALC|MyCancerGenome|TdgClinicalTrial|CIViC|GuideToPharmacology|MyCancerGenomeClinicalTrial	27160228|28377484|17288876
FLT4	TELATINIB	inhibitor	TALC|MyCancerGenome|TdgClinicalTrial|ChemblInteractions
FLT4	MK-2461	inhibitor	GuideToPharmacology|TTD
FLT4	LENVATINIB	inhibitor	TALC|MyCancerGenome|TdgClinicalTrial|GuideToPharmacology	17943726
FLT4	BRIVANIB ALANINATE	inhibitor	ChemblInteractions
FLT4	RABEPRAZOLE SODIUM	inhibitor	MyCancerGenome|TTD
FLT4	SORAFENIB	antagonist|inhibitor	TALC|DTC|TdgClinicalTrial|TEND|MyCancerGenomeClinicalTrial|PharmGKB	16133532|16729906|17296815|16474853|16757355|28362716
FLT4	SUNITINIB	inhibitor	TALC|TdgClinicalTrial|TEND|GuideToPharmacology|MyCancerGenomeClinicalTrial|PharmGKB	15688612|17605814|17296815|22015057|19248971|17367763|16685460
FLT4	FORETINIB	inhibitor	MyCancerGenome|ChemblInteractions|GuideToPharmacology
FLT4	MOTESANIB	inhibitor	TALC|MyCancerGenome|TdgClinicalTrial|ChemblInteractions|GuideToPharmacology
FLT4	REGORAFENIB	inhibitor	TALC|MyCancerGenome|ChemblInteractions|MyCancerGenomeClinicalTrial
FLT4	TESEVATINIB	inhibitor	MyCancerGenome|TdgClinicalTrial|GuideToPharmacology
FLT4	CEDIRANIB	inhibitor	TALC|DTC|TdgClinicalTrial|ClearityFoundationClinicalTrial|ChemblInteractions|GuideToPharmacology
FLT4	TIVOZANIB	inhibitor	TALC|MyCancerGenome|TdgClinicalTrial|ClearityFoundationClinicalTrial|ChemblInteractions|GuideToPharmacology|TTD
FLT4	BMS-690514	inhibitor	ChemblInteractions
FLT4	NINTEDANIB ESYLATE	inhibitor	ChemblInteractions
FLT4	DOVITINIB	inhibitor	DTC|TdgClinicalTrial|ClearityFoundationClinicalTrial|ChemblInteractions|GuideToPharmacology
FLT4	AXITINIB	inhibitor	TALC|MyCancerGenome|TdgClinicalTrial|ChemblInteractions|CancerCommons|MyCancerGenomeClinicalTrial	18541897
FLT4	CHIAURANIB	inhibitor	ChemblInteractions
FLT4	GLESATINIB	inhibitor	TALC|MyCancerGenome|TdgClinicalTrial
FLT4	L-21649	inhibitor	ChemblInteractions
FLT4	PEXMETINIB	inhibitor	GuideToPharmacology
FLT4	SU-014813	inhibitor	ChemblInteractions
FLT4	4SC-203	inhibitor	ChemblInteractions
FLT4	TAFETINIB	inhibitor	GuideToPharmacology
FLT4	FRUQUINTINIB	inhibitor	TdgClinicalTrial|ChemblInteractions|GuideToPharmacology|TTD
FLT4	SURUFATINIB	inhibitor	ChemblInteractions|TTD
FLT4	ILORASERTIB	inhibitor	DTC|ChemblInteractions|GuideToPharmacology
FLT4	CC-223	inhibitor	GuideToPharmacology
FLT4	FAMITINIB	inhibitor	ChemblInteractions|TTD
FLT4	TAK-593	inhibitor	ChemblInteractions
FLT4	SEMAXANIB	inhibitor	ChemblInteractions
FLT4	PAZOPANIB HYDROCHLORIDE	inhibitor	ChemblInteractions
FLT4	KRN-633	inhibitor	ChemblInteractions
FLT4	RG-1530	inhibitor	ChemblInteractions
FLT4	ANLOTINIB	inhibitor	ChemblInteractions
FLT4	CEP-7055	inhibitor	ChemblInteractions
FLT4	XL-999	inhibitor	ChemblInteractions
FLT4	AG-13958	inhibitor	ChemblInteractions
FLT4	BRIVANIB	inhibitor	ChemblInteractions
FLT4	VATALANIB	inhibitor	DTC|MyCancerGenome|TdgClinicalTrial|ChemblInteractions|GuideToPharmacology|TTD	17584317
FLT4	LENVATINIB MESYLATE	inhibitor	ChemblInteractions
FLT4	MGCD-265	inhibitor	ChemblInteractions
FLT4	LUCITANIB	inhibitor	ChemblInteractions|MyCancerGenomeClinicalTrial
FLT4	SUNITINIB MALATE	inhibitor	ChemblInteractions
FLT4	ENMD-2076	inhibitor	MyCancerGenome|TdgClinicalTrial
FLT4	X-82	inhibitor	MyCancerGenome|ChemblInteractions
FLT4	JNJ-26483327	inhibitor	ChemblInteractions|TTD
FLT4	CEP-11981	inhibitor	ChemblInteractions
FLT4	SORAFENIB TOSYLATE	inhibitor	ChemblInteractions
FLT4	CP-459632	inhibitor	ChemblInteractions
FLT4	SITRAVATINIB	inhibitor	GuideToPharmacology
FLT4	ALSTERPAULLONE		DTC
FLT4	SP-600125		DTC
FLT4	GO-6976		DTC
FLT4	IMC-3C5		TdgClinicalTrial|TTD	22515444
FLT4	SB-220025		DTC
FLT4	PEGPLERANIB SODIUM		TdgClinicalTrial
FLT4	AZAKENPAULLONE		DTC
FLT4	TANDUTINIB		DTC
FLT4	ERLOTINIB		DTC
FLT4	GW843682X		DTC
FLT4	PF-00562271		DTC
FLT4	GEFITINIB		DTC
FLT4	KENPAULLONE		DTC
FLT4	MLN-8054		DTC
FLT4	TAK-715		DTC
FLT4	CENISERTIB		DTC
FLT4	SB-203580		DTC
FLT4	SOTRASTAURIN		DTC
FLT4	GW441756X		DTC
FLT4	CHLORPYRAMIN HYDROCHLORIDE		DTC	19610651
FLT4	OSI-632		DTC
FLT4	TAE-684		DTC
FLT4	AZD-1152-HQPA		DTC
FLT4	TOZASERTIB		DTC
FLT4	MUPARFOSTAT		TdgClinicalTrial|TTD
FLT4	DORAMAPIMOD		DTC
FLT4	ENTRECTINIB		DTC
FLT4	GSK-269962A		DTC
ALDH3A1	CYCLOPHOSPHAMIDE		PharmGKB
ALDH3A1	FLUOROURACIL		PharmGKB
ALDH3A1	ALCOHOL		NCI	15909415|12652939|14987799
ALDH3A1	ANTABUSE		NCI	7907815
ALDH3A1	DOXORUBICIN		PharmGKB
ALDH3A1	DISULFIRAM		NCI	2185582
PTHLH	CAL	inhibitor	ChemblInteractions
PTHLH	VINBLASTINE		NCI	9784008
FCGR2A	ETANERCEPT	ligand	PharmGKB	15526004|27463856|19128982|15457442|24048425|27044681
FCGR2A	VALZIFLOCEPT		TTD
FCGR2A	RITUXIMAB		PharmGKB	17324336|30457672|16609067
FCGR2A	TRASTUZUMAB		PharmGKB	18347005|21109570|17139284|17704420|17016423
FCGR2A	CETUXIMAB		PharmGKB	23296156|27897268|17139284|17704420|17016423|28719596|30318772
FCGR2A	INFLIXIMAB		PharmGKB	25823785|24667440|24048425|27044681
FCGR2A	ADALIMUMAB		PharmGKB	25823785|17139284|24667440|17016423|24048425|27044681
AMH	DIETHYLSTILBESTROL		NCI	2286533|9751506
AMH	TESTOSTERONE		NCI	11248089|11545286|1292985|14584782|11315948|7962305|7818099
MIF	CHEMBL524449		DTC	21719283
IL15RA	ALT-803	agonist	TTD
IL15RA	INTERLEUKIN 15, RECOMBINANT NON-GLYCOSYLATED	agonist	GuideToPharmacology
APOA5	LOVASTATIN		PharmGKB	19530961
APOA5	FENOFIBRATE		PharmGKB	17431185|19057464|19056598
APOA5	SIMVASTATIN		PharmGKB	19530961
APOA5	ATORVASTATIN		PharmGKB	19530961

## Sheet: ST10
Supplementary Table 10. Open Targets for the causal candidate proteins
symbol	Drugs_Names	Drug_Type	Small_Molecule_Druggable_Genome_Member	Category_ab
MIF	IMALUMAB , IGURATIMOD	ab , sm	Y	Predicted_Tractable_ab_High_confidence
PTHLH	CAL	ab	N	Clinical_Precedence_ab
FLT4	SU-014813 , IMC-3C5 , TAK-593 , TELATINIB , BMS-690514 , X-82 , FAMITINIB , XL-820 , GLESATINIB , MOTESANIB , ILORASERTIB , CHIAURANIB , SURUFATINIB , LUCITANIB , OSI-930 , CEP-11981 , 4SC-203 , XL-999 , PAZOPANIB HYDROCHLORIDE , SEMAXANIB , RG-1530 , LENVATINIB MESYLATE , BRIVANIB ALANINATE , JNJ-26483327 , FRUQUINTINIB , DOVITINIB , BRIVANIB , LINIFANIB , FORETINIB , TIVOZANIB , NINTEDANIB , VA…	sm , ab , sm , sm , sm , sm , sm , sm , sm , sm , sm , sm , sm , sm , sm , sm , sm , sm , sm , sm , sm , sm , sm , sm , sm , sm , sm , sm , sm , sm , sm , sm , sm , sm , sm , sm , sm , sm , sm , sm , sm , sm , sm	Y	Clinical_Precedence_ab
CCDC126	NA	NA	N	Predicted_Tractable_ab_High_confidence
B3GAT3	NA	NA	N	Predicted_Tractable_ab_Medium_to_low_confidence
IL15RA	NA	NA	N	Predicted_Tractable_ab_High_confidence
FCGR2A	NA	NA	N	Predicted_Tractable_ab_High_confidence
TDGF1	BIIB-015	ab	N	Clinical_Precedence_ab
ST3GAL6	NA	NA	N	Predicted_Tractable_ab_Medium_to_low_confidence
FUT3	NA	NA	N	Predicted_Tractable_ab_Medium_to_low_confidence
GLCE	NA	NA	N	Predicted_Tractable_ab_Medium_to_low_confidence
CDON	NA	NA	N	Predicted_Tractable_ab_High_confidence
ALDH3A1	NA	NA	Y	Predicted_Tractable_ab_High_confidence
RGMB	NA	NA	N	Predicted_Tractable_ab_Medium_to_low_confidence
FSTL1	NA	NA	N	Predicted_Tractable_ab_High_confidence
APOA5	NA	NA	N	Predicted_Tractable_ab_High_confidence
AMH	NA	NA	N	Predicted_Tractable_ab_High_confidence
BAG3	NA	NA	N	Predicted_Tractable_ab_High_confidence
